## 1 **Restoration of PITPNA in Type 2 diabetic human islets reverses pancreatic beta-cell dysfunction**

2  
3 Yu-Te Yeh<sup>1,2,17</sup>, Chandan Sona<sup>1,2,17</sup>, Xin Yan<sup>3,4</sup>, Adrija Pathak<sup>5</sup>, Mark I. McDermott<sup>6</sup>, Zhigang Xie<sup>6</sup>, Liangwen Liu<sup>7</sup>,  
4 Anoop Arunagiri<sup>8</sup>, Yuting Wang<sup>4</sup>, Amaury Cazenave-Gassiot<sup>9,10</sup>, Adhideb Ghosh<sup>11</sup>, Ferdinand von Meyenn<sup>11</sup>,  
5 Sivarajan Kumarasamy<sup>12</sup>, Sonia M. Najjar<sup>12</sup>, Shiqi Jia<sup>13</sup>, Markus R. Wenk<sup>9,10</sup>, Alexis Traynor-Kaplan<sup>14,15</sup>, Peter  
6 Arvan<sup>8</sup>, Sebastian Barg<sup>7</sup>, Vytas A. Bankaitis<sup>5,6,16</sup>, and Matthew N. Poy<sup>1,2,4,18 #</sup>

7  
8 <sup>1</sup> John Hopkins University, All Children's Hospital, St. Petersburg, Florida, 33701, USA

9 <sup>2</sup> John Hopkins University, Department of Medicine, Division of Endocrinology, Diabetes and Metabolism,  
10 Baltimore, Maryland, 21287 USA

11 <sup>3</sup> Translational Neurodegeneration Section "Albrecht-Kossel", Department of Neurology, University Medical  
12 Center Rostock, Rostock, 18147 Germany

13 <sup>4</sup> Max Delbrück Center for Molecular Medicine, Robert Rössle Strasse 10, Berlin, 13125 Germany

14 <sup>5</sup> Department of Biochemistry & Biophysics, Texas A&M University, College Station, TX, 77843, USA

15 <sup>6</sup> Department of Molecular & Cellular Medicine, Texas A&M Health Science Center, College Station, TX, 77843,  
16 USA

17 <sup>7</sup> Medical Cell Biology, Uppsala University, 75123 Uppsala, Sweden

18 <sup>8</sup> Division of Metabolism, Endocrinology, and Diabetes, University of Michigan Medical School, Ann Arbor,  
19 Michigan, 48105, USA

20 <sup>9</sup> Singapore Lipidomics Incubator, Life Sciences Institute, National University of Singapore, 117456 Singapore

21 <sup>10</sup> Department of Biochemistry and Precision Medicine TRP, Yong Loo Lin School of Medicine, National  
22 University of Singapore, 117597 Singapore

23 <sup>11</sup> Laboratory of Nutrition and Metabolic Epigenetics, Department of Health Sciences and Technology, ETH Zurich,  
24 Schwerzenbach, 8603 Switzerland

25 <sup>12</sup> Department of Biomedical Sciences, Heritage College of Osteopathic Medicine, Ohio University, Athens, OH,  
26 45701 USA

27 <sup>13</sup> Institute of Clinical Medicine, First Affiliated Hospital of Jinan University, Guangzhou, China

28 <sup>14</sup> Department of Medicine, University of Washington School of Medicine, Seattle, WA, 98195, USA

29 <sup>15</sup> ATK Innovation, Analytics and Discovery, North Bend, WA, 98045 USA

30 <sup>16</sup> Department of Chemistry, Texas A&M University, College Station, TX, 77843, USA

31 <sup>17</sup> Equal contribution

32 <sup>18</sup> Lead contact

33  
34 **#Correspondence and reprint requests should be addressed to:**

35 Matthew N. Poy, Ph.D.

36 Johns Hopkins All Children's Hospital

37 Johns Hopkins University School of Medicine

38 Department of Medicine

39 Division of Endocrinology, Diabetes and Metabolism

40 Institute for Fundamental Biomedical Research

41 600 Sixth Avenue South

42 St. Petersburg, Florida 33701

43 P: (727) 767-4915

44 F: (727) 767-2821

45 **E-mail: [mpoy1@jhmi.edu](mailto:mpoy1@jhmi.edu)**

46 **ORCID: 0000-0002-4904-2426**

47  
48  
49  
50  
51 **Running title:**

52 PITPNA rescues  $\beta$ -cell function

53

## 54 SUMMARY

55 Defects in insulin processing and granule maturation are linked to pancreatic beta-cell failure during type 2 diabetes  
56 (T2D). Phosphatidylinositol transfer protein alpha (PITPNA) stimulates activity of phosphatidylinositol (PtdIns) 4-  
57 OH kinase to produce sufficient PtdIns-4-phosphate (PtdIns-4-P) in the trans-Golgi network to promote insulin  
58 granule maturation. *PITPNA* in beta-cells of T2D human subjects is markedly reduced suggesting its depletion  
59 accompanies beta-cell dysfunction. Conditional deletion of *Pitpna* in the beta-cells of *Ins-Cre; Pitpna<sup>lox/lox</sup>* mice leads  
60 to hyperglycemia resulting from decreased glucose-stimulated insulin secretion (GSIS) and reduced pancreatic beta-  
61 cell mass. Furthermore, *PITPNA* silencing in human islets confirmed its role in PtdIns-4-P synthesis and led to  
62 impaired insulin granule maturation and docking, GSIS, and proinsulin processing with evidence of ER stress.  
63 Restoration of *PITPNA* in islets of T2D human subjects reversed these beta-cell defects and identify *PITPNA* as a  
64 critical target linked to beta-cell failure in T2D.

## 66 KEYWORDS

67 Phosphatidylinositol, insulin secretion, granule biogenesis, pancreatic islet, beta-cell failure  
68

## 69 INTRODUCTION

70 Type 2 diabetes (T2D) is a non-autoimmune disease of impaired insulin signaling that afflicts ~10% of the population  
71 in the United State alone (Eizirik et al., 2020; Nolan and Prentki, 2019). Both impaired insulin release and reduced  
72 beta-cell mass contribute to the beta-cell failure that occurs during T2D (Campbell and Newgard, 2021; Porksen et  
73 al., 2002; Rhodes, 2005). Beta-cell failure is calculated to associate with a 24-65% loss of measurable beta-cell mass  
74 and a 50-97% loss of secretory capacity after disease onset (Chen et al., 2017; Liu et al., 2021). Prior to the events  
75 that cause this decline, beta-cells functionally accommodate peripheral insulin resistance for a limited time in two  
76 ways. First, beta-cells increase insulin production (Campbell and Newgard, 2021; Nolan and Prentki, 2019). Second,  
77 beta-cells increase their proliferation to expand the pool of insulin-producing cells in order to compensate for  
78 increased metabolic demand (Alejandro et al., 2015; Ferrannini, 2010; Muoio and Newgard, 2008). However, beta-  
79 cells in T2D patients ultimately succumb to multiple complications that include endoplasmic reticulum (ER) stress,  
80 glucotoxicity, and dedifferentiation (Back and Kaufman, 2012; Fonseca et al., 2011; Shrestha et al., 2021; Talchai et  
81 al., 2009). The precise mechanisms underlying the decline of both beta-cell secretion and mass remain unclear. As a  
82 result, worldwide efforts continue to focus on identifying the molecular bases of these defects (Rohm et al., 2022;  
83 van Raalte and Verchere, 2017; Yong et al., 2021).

84 Phosphoinositides define a set of chemically distinct phosphorylated derivatives of the glycerophospholipid  
85 phosphatidylinositol (Balla, 2013). The central importance of phosphoinositide signaling in regulating cellular  
86 homeostasis in eukaryotes is demonstrated in two ways. First, the diversity of cellular activities regulated by  
87 phosphoinositide metabolism is striking. Phosphoinositide signaling controls cellular functions that range from  
88 membrane trafficking to receptor signaling at the plasma membrane, autophagy, transcription, mRNA transport,  
89 cytoskeleton dynamics, and numerous other activities (De Camilli et al., 1996; Di Paolo and De Camilli, 2006; Hokin

90 and Hokin, 1953; Martin, 1998). Second, even subtle derangements in phosphoinositide metabolism contribute  
91 instrumentally to many diseases -- including diabetes (Bridges and Saltiel, 2012; Rameh and Deeney, 2016; Wuttke,  
92 2015). Phosphatidylinositol transfer proteins (PITPs) are highly conserved molecules that regulate the interface  
93 between lipid metabolism and cellular functions (Bankaitis et al., 2010; Cleves et al., 1991). PITPs promote the  
94 activity of phosphatidylinositol (PtdIns) 4-OH kinases and PtdIns-4 phosphate (PtdIns-4-P) synthesis in eukaryotic  
95 cells (Ashlin et al., 2021; Lete et al., 2020; Xie et al., 2018). There are at least three soluble PITPs expressed in  
96 mammals -- PITP $\alpha$ /PITPNA, PITP $\beta$ /PITPNB, and rdgB $\beta$ /PITPnc1 (Dickeson et al., 1989; Fullwood et al., 1999;  
97 Tanaka and Hosaka, 1994). PITPNA and PITPNB share ~77% sequence identity, are encoded by distinct genes, and  
98 both PITPNA and PITPNB are characterized as transfer proteins for several phospholipids including PtdIns in vitro  
99 (Helmkamp et al., 1974; Wirtz, 1991). However, rather than functioning as inter-organelle lipid transfer proteins in  
100 cells, all available data are more consistent with PITPs serving as metabolic sensors that facilitate the presentation of  
101 PtdIns to PtdIns 4-OH kinases in vivo -- thereby channeling PtdIns-4-P signaling to specific (and diverse) biological  
102 outcomes (Schaaf et al., 2008). In that regard, PITPs contribute to secretory vesicle formation from the trans-Golgi  
103 network (TGN), to Ca<sup>2+</sup>-activated secretion in permeabilized neuroendocrine cells, and to the regulation of Golgi  
104 dynamics in embryonic neural stem cells of the developing mouse neocortex (Bankaitis et al., 1990; Hay and Martin,  
105 1993; Lete *et al.*, 2020; Ohashi et al., 1995; Xie and Bankaitis, 2022; Xie *et al.*, 2018).

106 Here we first demonstrate that functional ablation of *Pitpna* in murine beta-cells results in random-fed  
107 hyperglycemia due to both impaired glucose-stimulated insulin secretion (GSIS) and reduced beta-cell number. These  
108 defects are accompanied by induction of ER stress and deranged mitochondrial dynamics and performance.  
109 Consistent with the murine studies, we further show that expression of *PITPNA* (referred to as human *PITPNA* and  
110 mouse *Pitpna*) is markedly diminished in pancreatic islets of T2D human subjects compared to non-diabetic donors.  
111 Such a downregulation is of functional consequence as reduced *PITPNA* levels in isolated human islets compromised  
112 PtdIns-4-P synthesis in the Golgi system, impaired insulin granule maturation and docking, and induced both ER and  
113 mitochondrial stress. Finally, we demonstrate that restoration of *PITPNA* expression in isolated pancreatic islets from  
114 T2D human subjects rescued insulin secretory capacity and granule biogenesis and alleviated ER stress. Taken  
115 together, these results establish that diminished *PITPNA* function is a major cell-autonomous contributor to reduced  
116 beta-cell mass and insulin output and, ultimately, to the beta-cell failure that represents a cardinal feature of T2D  
117 pathogenesis.

118

## 119 **RESULTS**

### 120 ***Pitpna* is a direct target of miR-375 in the pancreatic beta-cell**

121 The microRNA miR-375 is a potent regulator of insulin secretion that directly targets expression of several genes  
122 including *Myotrophin*, *Cadm1*, *Gephyrin* (*Gphn*), and *Elavl4/HuD* (Poy et al., 2004; Poy et al., 2009; Tattikota et al.,  
123 2014; Tattikota et al., 2013). An extended analysis using the TargetScan algorithm identified a candidate binding site  
124 for miR-375 in the 3'UTR of the gene *Pitpna* (Agarwal et al., 2018). This gene encodes a phosphatidylinositol transfer

125 protein and is expressed in pancreatic beta-cells (Figure 1A). To determine whether *Pitpna* is a genuine miR-375  
126 target, the full-length mouse *Pitpna* 3'UTR (2709-nt, *Pitpna* WT) was subcloned into a luciferase reporter construct.  
127 The effects of modulating miR-375 activity on expression of this reporter were then determined. As expected,  
128 luciferase expression was inhibited in the presence of the miR-375 mimic (375-mimic) relative to its expression when  
129 cells were incubated with a pool of scrambled control mimics (Ctrl-mimic) (Figure S1A). Moreover, miR-375 directly  
130 targets this specific site binding site as evidenced by our observation that site-directed mutagenesis of the candidate  
131 binding site in the 3'UTR (*Pitpna* MUT) abolished the inhibitory effect of the miR-375 mimic (Figure S1A). To test  
132 whether endogenous *Pitpna* expression is subject to regulation by miR-375 in vivo, murine insulinoma MIN6 cells  
133 were transfected with an inhibitory antisense RNA oligonucleotide directed against miR-375 (Antg-375) to reduce  
134 expression of this miRNA (Figure S1B). The Antg-375-mediated silencing of miR-375 resulted in increased *Pitpna*  
135 mRNA levels when compared to cells transfected with a control pool of scrambled antisense oligonucleotides (Antg-  
136 Ctrl) (Figure S1B). Immunoblot analyses confirmed that inhibition of miR-375 resulted in elevated steady-state levels  
137 of *Pitpna* as well as other miR-375 targets (i.e. *Cadm1*, *Gphn*). Conversely, transfection with the 375-mimic reduced  
138 the steady-state levels of all three of these proteins in a dose-dependent manner (Figures S1C, D). Direct binding of  
139 miR-375 with its target genes is mediated by the RNA-binding protein Argonaute2 (*Ago2*) (Tattikota *et al.*, 2014).  
140 Consistent with the abolition of miR-375 action, conditional deletion of *Ago2* in pancreatic beta-cells (*Ins-Cre*,  
141 *Ago2<sup>flox/flox</sup>*) de-repressed *Pitpna*, *Cadm1* and *Gphn* expression (Figure S1E).

142 *Pitpna* activity represents an interesting target for miR-375 control as it is an established mediator of PtdIns-  
143 4-P synthesis within the mammalian TGN (Lete *et al.*, 2020; Xie *et al.*, 2018), and PtdIns-4-P is required for the  
144 recruitment of budding factors and secretory granule formation (Cruz-Garcia *et al.*, 2013). Further evidence in support  
145 of *Pitpna* expression being a physiologically relevant miR-375 target in beta-cells was provided by quantitative liquid  
146 chromatography-tandem mass spectrometry (LC/MSMS) analyses of the MIN6 murine insulinoma cell line lipidome  
147 as a function of *Pitpna* expression. Transfection of MIN6 cells with Antg-375 oligonucleotides to inhibit miR-375  
148 resulted in the elevation of total bulk PtdIns in these cells as well as increased levels of multiple PtdIns molecular  
149 species (Figure S1F). Given the elevated insulin secretory output observed after inhibition of miR-375 (Poy *et al.*,  
150 2004), these results suggest that *Pitpna* functional status is linked to PtdIns metabolism in the murine beta-cell.

151

## 152 **Decreased PIP3 expression in isolated islets of T2D human subjects**

153 We next examined whether PIP3 functional status is an important factor in human diabetes. Datasets obtained  
154 from transcriptomic RNA sequencing analyses performed on isolated human islet cells were interrogated for altered  
155 *PIP3* expression (Fadista *et al.*, 2014; Muraro *et al.*, 2016; Xin *et al.*, 2016). Notably, single cell RNA-seq analyses  
156 showed *PIP3* expression was reduced in beta-cells from T2D donors in comparison to non-diabetic human donors  
157 with no change observed in alpha, and gamma-cell populations (Figures 1B-D) (Xin *et al.*, 2016). Moreover, analyses  
158 of global transcriptomic RNA sequencing data from islets of human subjects stratified according to hemoglobin A1C  
159 (HbA1c) levels were also informative. HbA1c is a measure of long-term glycemia and the patients were classified as  
160 non-diabetic (HbA1c<5.7%), pre-diabetic (5.7-6.4), and diabetic (>6.5) (Fadista *et al.*, 2014). *PIP3* gene

161 expression (reads per million) was reduced in islets of T2D subjects (HbA1c >6.5) relative to the expression levels  
162 recorded for islets of non-diabetic controls (HbA1c <5.7, Figure 1E). Indeed, *PITPNA* expression was inversely  
163 correlated with both HbA1c levels and body mass index (BMI) across all subjects (Figures 1F, G). This inverse  
164 correlation indicates that both body weight and glycemic status are parameters associated with changes in *PITPNA*  
165 expression. Expression analyses using quantitative real-time polymerase chain reaction (qRT-PCR) and  
166 immunoblotting further corroborated reduced *PITPNA* expression in isolated islets of T2D donors compared to non-  
167 diabetic control subjects (Figures 1H, I and Table S1). These collective data demonstrate that reduced *PITPNA*  
168 expression in pancreatic beta-cells of human subjects is associated with several hallmarks of predisposition to T2D.

169

### 170 **Whole body *Pitpna* knockout mice exhibit decreased pancreatic beta-cell mass**

171 One of the signature phenotypes of *Pitpna* whole body knockout mice is reduced pancreatic islet numbers marked by  
172 shrunken islet morphologies and vacuolations (Alb et al., 2003). As the majority of *Pitpna* total-body knockout  
173 (*Pitpna* KO) mice die within the first 48 hours after birth, pancreata were isolated from these animals within the first  
174 24 hours of birth and subjected to islet morphometric analysis. In addition to quantifying the reduction in overall islet  
175 number, we observed that the number of insulin<sup>+</sup> cells per area of pancreas (mm<sup>2</sup>) appeared reduced in *Pitpna* KO  
176 mice compared to littermate controls (Figures S2A, B). These reductions in beta-cell number were accompanied by  
177 a proportional decline in total pancreatic insulin content (Figure S2C). By contrast, proinsulin levels were elevated  
178 in whole pancreas lysates derived from *Pitpna* null mice relative to controls and these data indicate that loss of *Pitpna*  
179 expression compromised the relative efficiency of proinsulin processing for insulin storage (Figure S2C). Analysis  
180 of *Pitpna* null beta-cells by transmission electron microscopy (TEM) showed reduced numbers of docked granules  
181 at the plasma membrane, a reduction in the number of mature granules, and reduced overall granule size in the mutant  
182 islets relative to littermate controls (Figures S2D-F). Lastly, terminal nucleotidyl transferase dUTP nick end labeling  
183 (TUNEL) experiments revealed a significant increase in the number of beta-cells undergoing apoptosis in *Pitpna*  
184 whole body knockout pancreas compared to controls (Figures S2G, H). The apoptotic phenotype was cell-specific.  
185 No changes were observed in TUNEL staining of the glucagon<sup>+</sup> cell population (Figure S2I), or in Ki-67<sup>+</sup> beta-cell  
186 numbers in *Pitpna* null mice (Figures S2J, K).

187

### 188 **Conditional deletion of *Pitpna* in beta-cells impairs glucose-stimulated insulin secretion (GSIS)**

189 To more specifically assess the role of *Pitpna* in beta-cell physiology, two approaches were taken. First, we  
190 transfected the murine insulinoma cell line MIN6 with either a scrambled siRNA control pool (si-*Ctrl*) or an siRNA  
191 pool targeting *Pitpna* (si-*Pitpna*) designed to achieve a reduction in *Pitpna* expression at least as great as that seen in  
192 the beta-cells of T2D islets, in order to look directly at the role of *Pitpna* in pancreatic beta-cell function. The  
193 transfected cells were subsequently treated with glucose in concentrations ranging from 5.5mM to 25mM and insulin  
194 secretion responses were measured. Indeed, insulin release in response to 10 and 25mM glucose was markedly  
195 reduced in MIN6 cells inhibited for *Pitpna* expression (Figure S3A-C). Likewise, intracellular insulin content was  
196 also significantly reduced in MIN6 cells incubated in 25mM glucose -- indicating *Pitpna* contributes to insulin

197 expression, its processing and/or insulin granule biogenesis (Figure S3D). Conversely, transfection of MIN6 cells  
198 with an expression construct encoding the *Pitpna* cDNA increased cellular *Pitpna* expression and elevated both GSIS  
199 and insulin content in cells challenged with 25mM glucose (Figure S3E-H).

200 Second, *Pitpna* function was specifically assessed in beta-cells of adult mice. To that end, conditional beta-  
201 cell-specific *Pitpna* null mice were generated by crossing *Pitpna*-floxed animals with mice expressing Cre  
202 recombinase under control of the mouse *Insulin1* promoter (*Ins-Cre, Pitpna<sup>flox/flox</sup>* mice) (Thorens et al., 2015).  
203 Immunoblot analyses confirmed a significant reduction in *Pitpna* expression in isolated islets of *Ins-Cre, Pitpna<sup>flox/flox</sup>*  
204 mice by age 10 weeks (Figure 2A). While blood glucose levels were unchanged after an 8 hour fast, *Ins-Cre,*  
205 *Pitpna<sup>flox/flox</sup>* mice exhibited elevated random-fed blood glucose in addition to reduced plasma insulin levels relative  
206 to control animals (Figure 2B). Moreover, *Ins-Cre, Pitpna<sup>flox/flox</sup>* mice exhibited reduced plasma insulin and elevated  
207 blood glucose levels in response to an intraperitoneal glucose bolus (Figures 2C, D). Taken together these data  
208 diagnose impaired insulin secretion in *Pitpna*-deficient mice relative to *Pitpna*-sufficient control littermate mice.  
209 These results were further corroborated by a significant blunting of the ex vivo secretory response to both 16.7mM  
210 glucose and 40mM KCl in *Pitpna*-null islets relative to control islets (Figure 2E). High resolution analyses of granule  
211 morphology by TEM reported increased numbers of immature and empty insulin secretory granules and reductions  
212 in the numbers of both mature secretory granules and docked granules in *Ins-Cre, Pitpna<sup>flox/flox</sup>* islets (Figures 2F-H).  
213 Moreover, genetic ablation of *Pitpna* in beta-cells showed significant reductions in islet and beta cell numbers and  
214 beta-cell mass (Figure 2I, J). These declines were in part attributed to apoptotic cell death as TUNEL staining of  
215 pancreata of 8-week-old *Ins-Cre, Pitpna<sup>flox/flox</sup>* mice showed an increase in the number of TUNEL<sup>+</sup> beta-cells relative  
216 to littermate control mice (Figures 3A, B). No significant increases in TUNEL staining were detected in Gcg<sup>+</sup> alpha  
217 cells of *Ins-Cre, Pitpna<sup>flox/flox</sup>* mice (Figure 3C). These phenotypes in the beta-cell-specific *Pitpna* gene eviction model  
218 were similar to the results obtained for *Pitpna* whole body knockout mice. These results demonstrate that *Pitpna*: (i)  
219 is a potent regulator of beta-cell viability, (ii) is required for insulin granule maturation and secretion in beta-cells,  
220 and (iii) beta-cell *Pitpna* deficiency is sufficient to disrupt systemic glucose homeostasis in an animal model.

## 221 222 **Endoplasmic reticulum (ER) stress in *Pitpna*-deficient beta-cells**

223 Previous analysis in murine *Pitpna* null embryonic fibroblasts showed increased expression of the ER stress marker  
224 C/EBP homologous protein CHOP (Alb *et al.*, 2003). Since elevated CHOP levels are consistent with ER stress-  
225 induced apoptosis (Harding and Ron, 2002), CHOP expression was examined in isolated islets of conditional *Pitpna*  
226 knockout mice. Indeed, we observed elevated basal CHOP levels at steady state and upon challenge of beta-cells with  
227 hydrogen peroxide -- an established inducer of oxidative and ER stress-mediated apoptosis (Figure 3D) (Back and  
228 Kaufman, 2012; Wright et al., 2013). Furthermore, steady-state levels of the unfolded protein response regulator  
229 GRP78/BiP were also increased ~2-fold in *Pitpna* null islets. These observations confirm that *Pitpna*-deficient beta-  
230 cells experience elevated chronic ER stress. We considered the possibility that impaired insulin granule synthesis,  
231 maturation, and exocytosis feeds back to induce ER stress as a result of continued high-level production of proinsulin  
232 in the face of a TGN trafficking ‘bottleneck’. With regard to insulin processing, qRT-PCR analysis of the insulin

233 processing enzymes in isolated islets of *Ins-Cre, Pitpna<sup>flox/flox</sup>* mice revealed significant reductions in islet expression  
234 of *Proprotein convertase-1 (PC1/3)*, *Proprotein convertase-2 (PC2)*, and *Carboxypeptidase E (CPE)* (Figure 3E).  
235 These collective results report that *Pitpna* signaling is an essential component for maintaining beta-cell homeostasis.  
236 Chronic impairment of granule formation, maturation, and docking consequently triggers a cascade of ER stress and  
237 ultimately apoptosis. These defects represent the basis for the hyperglycemia observed in *Ins-Cre, Pitpna<sup>flox/flox</sup>* mice  
238 and illustrate the critical roles that this lipid transfer protein executes in the beta-cell.

239

### 240 **Pitpna regulates mitochondrial morphology in pancreatic beta-cells**

241 The ER and the mitochondria engage in close physical contacts that are dynamic and are components of an inter-  
242 organelle communication system that responds to the metabolic demands of the cell (Tabara et al., 2021). In that  
243 regard, we observed that *Pitpna*-deficiencies impact mitochondrial function as reported by oxygen consumption rates  
244 (OCR) in MIN6 cells. *Pitpna* deficiencies attenuated both basal and maximal cellular respiration (Figures S4A, B),  
245 and suppressed glycolytic turnover and capacity as reported by the lowered extracellular acidification rates (ECAR)  
246 exhibited by cells silenced for *Pitpna* expression (Figures S4C, D). These observations are congruent with previous  
247 studies showing that brain and liver lysates from *Pitpna* whole body knockout mice exhibit dramatically reduced total  
248 ATP and ATP/ADP ratios (Alb et al., 2003). That is, phenotypes also consistent with reduced mitochondrial activity  
249 (Haythorne et al., 2019).

250 The derangements in mitochondrial morphology observed in *Pitpna*-deficient MIN6 cells translated to the  
251 animal model. Analyses of mitochondrial morphology in beta-cells of *Ins-Cre, Pitpna<sup>flox/flox</sup>* mice established that  
252 mitochondria were markedly longer in those *Pitpna*-deficient beta-cells, and that the frequencies of swollen  
253 mitochondria were also significantly increased relative to littermate control animals (Figures S4E-H). Previous  
254 studies demonstrate the guanosine triphosphatase (GTPase) Dynamin-related protein 1 (*Drp1*) is recruited to MERCs  
255 where its oligomerization enhances mitochondria constriction and fission (Friedman et al., 2011; Smirnova et al.,  
256 2001), and that deletion of *Drp1* in beta-cells results in impaired GSIS (Hennings et al., 2018). Consistent with those  
257 findings, *Drp1* expression was significantly diminished in isolated islets of *Ins-Cre, Pitpna<sup>flox/flox</sup>* mice (Figure S4I).

258

### 259 **PITPNA regulates human pancreatic beta-cell function**

260 To experimentally assess whether PITPNA is a physiologically relevant regulator of human beta-cell function, both  
261 loss and gain-of-function approaches were taken in isolated islets of non-diabetic (ND) human donors. Implementing  
262 lentiviral constructs encoding either an shRNA (which encodes an siRNA targeting the human *PITPNA* mRNA  
263 sequence) or the human *PITPNA* full length cDNA, both knockdown (sh-*PITPNA*) and over-expression (OE-  
264 *PITPNA*) conditions were validated by immunoblotting methods and qRT-PCR (Figures 4A and S5A). GSIS was  
265 subsequently assessed in isolated human islets of ND donors after challenge with either sh-*PITPNA* or OE-*PITPNA*  
266 lentiviral vectors or a control lentivirus encoding a non-targeting shRNA vector (sh-*Ctrl*). Consistent with results  
267 from isolated islets of *Ins-Cre, Pitpna<sup>flox/flox</sup>* mice, lentiviral-mediated *PITPNA* knockdown inhibited insulin secretion  
268 upon stimulation with 25mM glucose, while GSIS was significantly elevated in the *PITPNA* over-expression

269 condition relative to mock treated islets (Figure 4B). In addition, intracellular  $[Ca^{2+}]_i$  was diminished in response to  
270 a 30mM KCl stimulus in islets of ND donors where *PITPNA* expression was inhibited. Those data support a model  
271 where the primary *PITPNA* execution point lies downstream of  $K^+$  channel closure – i.e. at the level of granule  
272 trafficking, docking and/or exocytosis (Figure 4C).

273 To interrogate how *PITPNA* affects stimulus-secretion coupling, total internal reflection (TIRF) microscopy  
274 was used to monitor exocytosis and docking of insulin granules in dispersed human islet cells. After plating, islet  
275 cells were treated with either sh-*PITPNA* or OE-*PITPNA* lentiviral vectors or their respective control lentivirus (sh-  
276 *Ctrl* or an empty vector control, *Ctrl*) (Figures 4D and E). In addition, a genetically encoded NPY-tdmOrange2  
277 marker was used to label granules (Figures 4D, E). Exocytosis was evoked by depolarization with elevated  $K^+$  (in the  
278 presence of diazoxide to prevent spontaneous depolarization) and it followed a biphasic time course (Figures 4F and  
279 G). Exocytosis was increased in the face of *PITPNA* overexpression (by 98% vs *Ctrl* cells;  $P=0.0004$  non-paired t-  
280 test; 50 *Ctrl* cells and 40 OE-*PITPNA* cells; 3 donors each; Figures 4F and H), and decreased by *PITPNA* silencing  
281 (by 47% vs sh-*Ctrl*;  $P=1E-05$  non-paired t-test; 40 sh-*Ctrl* cells and 43 sh-*PITPNA* cells; 3 donors each; Figures 4G  
282 and 4H). These data indicate a positive correlation between *PITPNA* expression and exocytosis in human beta cells  
283 and, from these observations, we conclude that *PITPNA*-dependent changes in exocytosis reflect changes in the  
284 secretory machinery of individual insulin granules. Electron microscopy imaging reported that insulin granule core  
285 density and numbers of docked vesicles were significantly reduced after *PITPNA* knockdown in isolated human ND  
286 islets relative to control lentivirus-treated islets (Figures 5A-C). Moreover, shRNA-mediated silencing of *PITPNA*  
287 impaired the formation of mature secretory granules (MSG) with a reciprocal increase in the numbers of immature  
288 secretory granules (ISG) (Figure 5D). Conversely, *PITPNA* over-expression in isolated ND islets increased MSG  
289 numbers with associated reductions in ISG numbers (Figure 5D). These results demonstrate that *PITPNA* is a potent  
290 regulator of granule maturation and docking in human beta-cells.

291 The collective insulin granule data collected in both human and mouse loss-of-function studies suggested  
292 *PITPNA* insufficiencies in human beta-cells ultimately disrupt proinsulin packaging into insulin granules. Indeed, in  
293 a manner consistent with the results from *Ins-Cre, Pitpna<sup>flox/flox</sup>* mice, proinsulin levels were elevated upon *PITPNA*  
294 silencing (sh-*PITPNA*) in isolated human ND islets (Figures 5E, F). Reciprocally, islet insulin levels were reduced  
295 relative to control lentivirus-treated human ND islets (sh-*Ctrl*) -- further reporting proinsulin processing is impaired  
296 upon loss of *PITPNA* activity. By contrast, increasing *PITPNA* expression in islets (OE-*PITPNA*) elevated both  
297 proinsulin and insulin levels compared to control-treated human ND islets (sh-*Ctrl*). These results demonstrate that  
298 the enhanced GSIS supported by increased *PITPNA* activity is supported by increased granule maturation and  
299 proinsulin processing (Figures 5E, F). Previous studies highlighted an association of proinsulin accumulation with  
300 perturbed expression of UPR/ER stress proteins (Arunagiri et al., 2018). Our findings with *Ins-Cre, Pitpna<sup>flox/flox</sup>* mice  
301 (Figure 3D) prompted examination of whether proinsulin accumulation in isolated ND human islets induces ER  
302 stress. Immunoblot analyses confirmed *PITPNA* silencing in ND human islets (sh-*PITPNA*) resulted in increased  
303 expression of CHOP as well as other components of the ER stress pathway -- including inositol-requiring enzyme 1  
304 alpha (IRE1a) and protein disulfide isomerase-a1 (PDI) (Figure 5G). By contrast, protein disulfide oxidase ER-



305 Oxidoreducin 1 alpha (ERO1) steady-state levels were decreased when *PITPNA* was silenced in ND human islets.  
306 These collective data report that expression levels of multiple components of the ER stress pathway are perturbed  
307 under conditions of *PITPNA* insufficiency (Figure 5G). Moreover, these collective data demonstrate that loss of  
308 *PITPNA* results in similar derangements in both human and mouse beta-cell systems. These include impaired granule  
309 biogenesis and maturation that is accompanied by increased islet expression of multiple ER stress markers such as  
310 CHOP -- a member of the C/EBP family of transcription factors linked to programmed cell death (Marciniak et al.,  
311 2004; Song et al., 2008; Zinszner et al., 1998).

312 The translation of phenotypes associated with *PITPNA* deficiencies from murine to human beta-cells  
313 extended to mitochondrial dysmorphologies. *PITPNA* silencing in ND human beta-cells resulted in lengthening of  
314 mitochondrial ribbons while *PITPNA* over-expression markedly shifted the morphological distribution to shorter  
315 mitochondria (Figures S5B, C). *PITPNA* silencing in human beta-cells also reduced the number of morphologically  
316 'orthodox' mitochondria with proportional increases in the frequencies of 'swollen' mitochondria (Figure S5D).  
317 These results demonstrate that *PITPNA* in human beta-cells potently regulates insulin exocytosis, intracellular  $Ca^{2+}$   
318 concentrations, granule maturation and docking, and mitochondrial morphology. The data further project that  
319 diminished *PITPNA* expression during the course of T2D is a plausible contributor to beta-cell failure.

#### 320 321 ***PITPNA* mediates PtdIns-4-P synthesis in human pancreatic islets**

322 The available data indicate *PITPNA* stimulates PtdIns 4-OH kinases by using its lipid-exchange activity to render  
323 PtdIns a better substrate for the enzyme. It is in this way that *PITPNA* promotes PtdIns-4-P synthesis (Bankaitis et  
324 al., 2012; Grabon et al., 2019; Xie *et al.*, 2018). To test whether reduction of *PITPNA* expression in human islets  
325 attenuates formation of PtdIns-4-P, we again performed shRNA-mediated silencing of *PITPNA* in isolated islets of  
326 non-diabetic donors. After 48 hours of incubation, PtdIns-4-P status was assessed using immunohistochemical  
327 methods (Figure 6A). The PtdIns-4-P signal in insulin<sup>+</sup> beta-cells was significantly diminished -- indicating lentiviral-  
328 mediated knockdown of *PITPNA* significantly reduced cellular levels of this phosphoinositide (Figure 6B). These  
329 results were supported by an independent assay monitoring GOLPH3 localization as this protein is recruited to TGN  
330 membranes by virtue of its ability to bind PtdIns-4-P (Kuna and Field, 2019) (Xie *et al.*, 2018). *PITPNA* silencing in  
331 isolated human islets evoked release of GOLPH3 from TGN membranes as evidenced by the significant reductions  
332 in GOLPH3 co-localization with the TGN marker GOLGIN97 (Figures 6C, D).

333 To further test whether reduced *PITPNA* expression in human islets attenuates PtdIns-4-P synthesis, *PITPNA*  
334 was either silenced or over-expressed in isolated islets of ND human donors. Mass spectrometry-based quantitative  
335 lipidomics were then performed to measure bulk cellular PtdIns and PtdIns-P levels. Although mass spectrometry  
336 cannot distinguish regio-isomers; PtdIns-4-P is the most abundant isomer in mammalian cells and PtdIns-4-P is  
337 estimated to constitute >90% of total cellular PtdIns-P (Hammond et al., 2012; Stephens et al., 1993). After  
338 normalization of PtdIns-P levels to total cellular PtdIns, the data demonstrate that *PITPNA* over-expression (*PITPNA*-  
339 *OE*) in isolated islets of ND human donors increased PtdIns-P levels compared to mock controls (*Ctrl*) (Figures 6E  
340 and S5E). Conversely, *PITPNA* silencing in isolated human islets decreased cellular PtdIns-P levels relative to control

341 islets (Figures 6F and S5F). These observations demonstrate that modulation of *PITPNA* in isolated human islets  
342 impacts PtdIns-4-P homeostasis, and are consistent with studies in mammalian neural stem cells (Xie *et al.*, 2018).

### 343 344 **Restoration of PITPNA rescues beta-cell function in T2D islets**

345 The weight of the collective data gleaned from both murine animal models and human islets, including the  
346 demonstration that *PITPNA* expression was diminished in pancreatic beta-cells of T2D human subjects, implicates  
347 *PITPNA* as a major factor in beta-cell failure during T2D. These aggregate results raised the provocative question of  
348 whether recovery of *PITPNA* expression in T2D islets restores function to the diseased tissue. Indeed, lentiviral-  
349 mediated induction of *PITPNA* in isolated islets from T2D human donors significantly elevated *PITPNA* expression  
350 levels in islets of the T2D donor (T2D-*PITPNA* OE), and these levels were comparable to the endogenous expression  
351 levels recorded for islets of the ND human donor (Non) (Figure 7A). Strikingly, the rescue of *PITPNA* expression in  
352 T2D islets significantly improved GSIS in response to 15mM glucose compared to control treated T2D islets (Figures  
353 7B and S6A). Moreover, recovery of *PITPNA* expression in T2D islets rescued PtdIns-4-P synthesis as evidenced by  
354 *PITPNA* inducing redistribution of GOLPH3 from a dispersed cytoplasmic localization to TGN membranes marked  
355 by GOLGIN97 (Figures 7C, D).

356 Restoration of *PITPNA* expression to T2D islets exhibited other profound effects. Electron microscopy  
357 analyses indicated insulin granule number, docking and maturation were rescued upon induction of *PITPNA*  
358 expression in T2D islets (Figure 7E). Notably, insulin granule number per  $\mu\text{m}^2$  was significantly lower in T2D islets  
359 compared to granule density in non-diabetic islets. Recovery of *PITPNA* expression in T2D beta-cells markedly  
360 rescued the reduction in granule number (Figure 7F), fully rescued the granule docking defects in T2D beta-cells  
361 (Figure 7G), and effected a partial rescue of mature granule numbers (Figure 7H). Additionally, restoration of  
362 *PITPNA* expression in islets of four individual T2D human donors (T2D-OE) resulted in the downregulation of  
363 steady-state levels of CHOP, PDI, and BiP/GRP78 (Figure S6B) as well as restoration of proinsulin expression  
364 (Figure S6C). Taken together, these results demonstrate that restoration of *PITPNA* expression in T2D beta-cells  
365 substantially reverses the GSIS defects, the impaired insulin granule biogenesis and maturation, and the chronic ER  
366 stress associated with human T2D.

### 367 368 **DISCUSSION**

369 Critical to the development of therapeutics for diabetes are strategies for promoting insulin release while preserving  
370 pancreatic beta-cell mass. Recent studies focus on defects in insulin processing and granule maturation as causes for  
371 reduced insulin secretion that are linked to all major forms of diabetes (Campbell and Newgard, 2021; Liu *et al.*,  
372 2021) – a focus that rests on demonstrations that: 1) glucose-dependent granule docking is a limiting factor for insulin  
373 secretion and 2) reduced granule docking characterizes beta-cell dysfunction during human T2D (Gandasi *et al.*,  
374 2018). In this study, we demonstrate that reduced *PITPNA*-dependent PtdIns-4-P signaling in the beta cell TGN  
375 results in beta-cell failure. We show that *PITPNA* deficiencies impair insulin granule maturation and exocytosis, and

376 that these trafficking defects induce proinsulin accumulation, promote chronic ER stress, and derange mitochondrial  
377 dynamics and performance. The data outline a high degree of functional dependence between the TGN, ER and  
378 mitochondria, and identify PITPNA as a central regulator of this intra-organelle crosstalk. Finally, we report the  
379 remarkable demonstration that restoring PITPNA expression to T2D human islets is sufficient to reverse beta-cell  
380 failure by rescuing GSIS, insulin granule maturation, proinsulin processing, and by alleviating the chronic ER stress  
381 that accompanies these defects in T2D beta-cells. These results: (i) highlight PITPNA-dependent PtdIns-4-P synthesis  
382 on TGN membranes as critical for sustaining insulin granule biogenesis and maturation, (ii) indicate compromise of  
383 this activity is a powerful marker of beta-cell failure during T2D, and (iii) identify new prospects for T2D therapy.

384 All available in vivo evidence, collected from single cell yeast to mammalian models, indicates that soluble  
385 PITPs potentiate constitutive membrane trafficking from late compartments of the secretory pathway – specifically  
386 TGN/endosomes. Analyses of headgroup-specific PITP mutants and localization of PtdIns-4-P biosensors indicate  
387 the biochemical basis for PITP function is to stimulate PtdIns-4-P synthesis on TGN/endosomal membranes with the  
388 result that PtdIns-4-P binding proteins (i.e. effectors of PtdIns-4-P signaling) are recruited to these compartments  
389 (Alb et al., 1995; Alb et al., 2007; Bankaitis *et al.*, 1990; Bankaitis *et al.*, 2010; Hay and Martin, 1993; Lete *et al.*,  
390 2020; Ohashi *et al.*, 1995; Schaaf *et al.*, 2008; Xie and Bankaitis, 2022; Xie *et al.*, 2018). It is in this fashion that  
391 PtdIns-4-P is proposed to act as a transient tag to convey spatial information that helps organize membrane trafficking  
392 (Balla, 2013; Behnia and Munro, 2005). The current demonstration that PITPNA is required for insulin granule  
393 formation, maturation and exocytosis now extends this concept to regulated membrane trafficking pathways in human  
394 pancreatic beta-cells. This conclusion is further supported by: (i) the demonstration that modulation of *PITPNA* in  
395 human beta-cells regulates PtdIns-P, (ii) the *Sac2* phosphatase is a PtdIns-4-P binding protein that localizes to the  
396 insulin granule surface where it mediates granule docking to the plasma membrane and exocytosis (Nguyen et al.,  
397 2019), and (iii) measurements reporting that PtdIns (the direct metabolic precursor of PtdIns-4-P) constitutes ~21%  
398 of insulin granule lipid in the INS-1 832/13 beta-cell line (MacDonald et al., 2015). While the precise role(s) of  
399 PtdIns-4-P in granule docking and exocytosis remains to be fully clarified, the demonstration that dephosphorylation  
400 of PtdIns-4-P by the phosphatase *Sac2* disrupts insulin granule docking and GSIS, and that *Sac2* expression is  
401 decreased in T2D islets alludes to its functional significance (Nguyen *et al.*, 2019; Omar-Hmeadi and Idevall-Hagren,  
402 2021). We suggest that *Sac2*-mediated dephosphorylation of PtdIns-4-P 'signals' the end of the insulin granule  
403 biogenesis/maturation phase, and 'identifies' the mature granule as competent for mobilization to the plasma  
404 membrane for docking and exocytosis.

405 A striking consequence associated with PITPNA inhibition in human beta-cells is the potent increase in  
406 proinsulin levels. Initial accumulation of proinsulin correlates with a stressed ER in islets of *Lepr<sup>db/db</sup>* mice as blood  
407 glucose levels rise (~237 mg/dL), and is maintained until proinsulin levels dramatically fall upon onset of severe  
408 hyperglycemia (~523 mg/dL) (Arunagiri et al., 2019). Our demonstration that PITPNA levels are significantly  
409 reduced in T2D islets compared to expression in islets of non-diabetic controls, and that restoring PITPNA expression  
410 to the beta-cell helps to recover proinsulin expression, agree with those previous findings. The accumulation of  
411 proinsulin detected after acute inhibition of *PITPNA* in human islets may reflect the impaired granule formation

412 and/or maturation at an early stage of dysfunction, that persists until chronic insulin demand and ER stress cause the  
413 beta-cell to cease proinsulin production leading to hyperglycemia. Moreover, the accumulation of proinsulin after  
414 acute inhibition of *PITPNA* shows downstream defects in granule maturation and docking and GSIS are ultimately  
415 linked to induce ER stress (Sun et al., 2015). Activation of the ER stress pathway might be directly related to adverse  
416 changes in mitochondrial or ER dynamics (Fonseca *et al.*, 2011; Harding and Ron, 2002), or in activation of an inter-  
417 organellar response that negatively feeds back on proinsulin export from the ER (Mousley et al., 2008).

418 The perturbations in mitochondrial performance and health of the endoplasmic reticulum in *PITPNA*-  
419 deficient beta-cells are notable. PtdIns-4-P is present on the surface of TGN-derived vesicles recruited to MERCs,  
420 and this PtdIns-4-P pool is reported to aid in potentiation of mitochondrial fission and ER dynamics (Liesa and  
421 Shirihai, 2013; Mishra and Chan, 2014; Nagashima et al., 2020; Tabara *et al.*, 2021; Youle and van der Blik, 2012).  
422 As *PITPNA* promotes PtdIns-4-P synthesis in the mammalian TGN by facilitating presentation of PtdIns to PtdIns 4-  
423 OH kinases (Xie *et al.*, 2018), we suggest that the *PITPNA*-regulated PtdIns-4-P pool in beta-cells coordinates  
424 actions of the TGN in ER/mitochondrial dynamics in addition to facilitating insulin granule biogenesis. It is presently  
425 thought that mitochondrial fission is essential for sustaining a healthy pool of mitochondria by allowing for the  
426 clearance of damaged mitochondria through mitophagy and de novo biogenesis (Bock and Tait, 2020; Youle and van  
427 der Blik, 2012). Moreover, mitophagy protects human pancreatic beta-cells from inflammatory damage during  
428 diabetes (Sidarala et al., 2020) -- indicating the removal of dysfunctional mitochondria is essential for preventing  
429 inflammatory stress and cell death. Our results showing mitochondrial lengthening as a consequence of functional  
430 ablation of *PITPNA* in both murine and human beta-cells suggests diminished *PITPNA*-dependent PtdIns-4-P  
431 synthesis impacts mitochondrial dynamics in the beta-cell. That *PITPNA* insufficiencies in human beta-cells induce  
432 accumulation of swollen mitochondria further emphasizes this point.

433 Our demonstration that *Pitpna* is a direct target of miR-375 shows that the complex relationship between the  
434 TGN, ER, and mitochondria is subject to regulation by the miRNA pathway. MiR-375 is the most abundant  
435 microRNA in the pancreatic beta-cell and is a potent regulator of insulin secretion and adaptive proliferation (Poy *et*  
436 *al.*, 2004; Poy *et al.*, 2009; Tattikota *et al.*, 2014; Tattikota *et al.*, 2013). Establishing an association between *Pitpna*  
437 and miR-375 suggests a framework for how the beta-cell exerts regulatory control over its critical functions such as  
438 granule maturation, exocytosis, and mitochondrial dynamics. We previously demonstrated how miR-375 targets (e.g.  
439 *Cadm1*, *Gphn*, *Elavl4* and *Mtpn*) regulate beta-cell secretion (Poy *et al.*, 2009; Tattikota *et al.*, 2013). Inclusion of  
440 *Pitpna* in this regulon amply illustrates the functional diversity of microRNA-targeted genes that mediate exocytosis.  
441 We posit that suppression of these genes by miR-375 provides broad regulatory control over the beta-cell secretory  
442 machinery and ‘secretome’ under normal steady state conditions and this circuit may prevent excess insulin release  
443 and safeguards the central nervous system from hypoglycemia (Poy, 2016). These findings reinforce the notion that  
444 the microRNA pathway is a critical component for how cells adapt to changes in their metabolic environment as well  
445 as demonstrate how disruption of this pathway renders the beta cell incapable of maintaining a proper homeostatic  
446 balance with the ultimate result of diabetic disease (LaPierre and Stoffel, 2017; Poy, 2016).

447 In summary, this study describes several important conceptual advances. These include: (i) establishment of  
448 PITPNA as a major regulator of PtdIns-4-P signaling in the TGN of human pancreatic beta-cells, (ii) demonstration  
449 that PITPNA is required for efficient insulin granule maturation, docking, secretion, and proinsulin processing in  
450 mammalian (including human) pancreatic beta-cells, and (iii) demonstration that restoration of PITPNA expression  
451 in human T2D beta-cells rescues insulin secretion, granule maturation and alleviates ER stress. These data not only  
452 highlight PITPNA deficiency as a major contributing factor to reduced insulin output and beta-cell failure, but also  
453 report a functional crosstalk between the miRNA pathway and lipid signaling control of membrane trafficking factors  
454 that are relevant to human diabetes. This study raises the intriguing prospect that enhancing PITPNA expression or  
455 activity in islets of T2D human subjects may rescue the multiple defects that contribute to beta-cell degeneration to  
456 the extent that physiologically significant activity is revived in the T2D pancreas.

457

## 458 **MATERIALS AND METHODS**

### 459 **Human Islets**

460 Human islets from non-diabetic (ND) and type 2 diabetic (T2D) subjects isolated from cadaveric pancreas were  
461 obtained from the Integrated Islet Distribution Program (IIDP), the University of Alberta IsletCore, Prodo  
462 Laboratories, and the Nordic Network for Clinical Islet Transplantation (Uppsala, Sweden) with permission from the  
463 Johns Hopkins Institutional Review Board (IRB00244487). Human islet cells were obtained from de-identified  
464 donors and all organ donors provided informed consent for use of human islets for research. Relevant donor  
465 information including age, gender, ethnicity, diabetes status and body mass index (BMI) are listed in Table S1.  
466 Diabetes status was determined from patient records and available hemoglobin A1c (HbA1c) data.

467

### 468 **Animals**

469 Mice were maintained on a 12-hour light/dark cycle with ad libitum access to regular chow food (2016 Teklad global  
470 16% diet, Envigo) and the Johns Hopkins Animal Care and Use Committee approved all experimental procedures  
471 under protocol MO18C281. Results were consistent in both genders; however, data from female mice are not shown.  
472 *Pitpna* whole-body knockout mice were previously described (Alb *et al.*, 2003; Xie *et al.*, 2018). *Pitpna*-floxed mice  
473 (VAB line) were generated using a *Pitpna*-floxed allele generated by TALEN-based methods and transplanted into  
474 C57BL/6 embryonic stem cells by homologous recombination. Details are available upon request. The successfully  
475 targeted *Pitpna* allele had a LoxP sequence inserted upstream of exon 8 and a neomycin cassette (flanked by Frt  
476 sequences)-LoxP sequence inserted downstream of exon 10. The neomycin cassette flanked by Frt sequences was  
477 removed by crossing to an FLP deleter strain. In the resulting strain (i.e. *Pitpna*-floxed strain), exons 8-10 of *Pitpna*  
478 were flanked by LoxP sequences. Deletion of exons 8-10 generates a *Pitpna* null allele. The primers for genotyping  
479 the *Pitpna*-floxed allele were: TAMU002\_LoxP\_F: 5'-AGTGAGTTCCAAAA TGGCCAGGTT-3'; and  
480 TAMU002\_LoxP\_R: 5'-GCCAGTTCTTTTTGTCGCTGTGAA-3'. The size of the PCR product was 242bp for the  
481 wild-type *Pitpna* allele, and 312bp for the floxed *Pitpna* allele. Floxed *Pitpna* mice were crossed with *Ins1-Cre* mice  
482 purchased from Jackson Labs (Thorens *et al.*, 2015). Floxed *Ago2* mice were generated and crossed with *Ins-Cre*

483 mice from P. Herrera as described (Tattikota *et al.*, 2014). *Lep<sup>ob/ob</sup>* mice (cat. no: 000632) were purchased from  
484 Jackson Laboratories, Maine, USA. Numbers of animals are reported in each figure legends, and experiments were  
485 conducted in a blinded manner where the genotype is unknown during actual testing.

486

#### 487 **Gene expression analysis in mouse and human islets**

488 Total RNA was extracted using the TRIzol reagent (Invitrogen). Quantitative real time PCR (qRT-PCR) for *miR-375*  
489 was quantified by TaqMan Assays using the TaqMan MicroRNA Reverse Transcription Kit and hsa-miR-375 primer  
490 sets (Thermo Fisher Scientific, 000564). *MiR-375* levels were normalized to *miR-U6* expression. For the expression  
491 of gene mRNAs, cDNA was synthesized using RevertAid First Strand cDNA synthesis kit (Fermentas), and qRT-  
492 PCR was measured using gene-specific primers with FastStart SYBR Green PCR Master Mix (Roche) on a StepOne  
493 Real-Time PCR System (ThermoFisher). Gene expression analysis from cell lines and mouse and human islets was  
494 performed as described, primers used with FastStart SYBR Green PCR Master Mix (Roche) are described in Table  
495 S4. Human islet expression data and accompanying donor information were previously published (Fadista *et al.*,  
496 2014) and are publicly accessible at Gene Expression Omnibus (GEO accession number GSE50398). Briefly, RNA-  
497 seq data sets were downloaded, trimmed (TrimGalore) and mapped to GRCh38 (HISAT2 mapper) (Kim *et al.*, 2015).  
498 Read counts for each sample were generated in SeqMonk software and normalised. The expression levels for *PITPNA*  
499 and *INSULIN* were correlated to the published clinical data included with the GEO submission. The single cell RNA-  
500 seq data (GEO accession number GSE85241) (Muraro *et al.*, 2016) was downloaded from [https://hemberg-](https://hemberg-lab.github.io/scRNA.seq.datasets/human/pancreas/)  
501 [lab.github.io/scRNA.seq.datasets/human/pancreas/](https://hemberg-lab.github.io/scRNA.seq.datasets/human/pancreas/) as a log normalized single cell experiment R object and processed  
502 using the R package Seurat v3.2.3 (Stuart *et al.*, 2019).

503

#### 504 **Analytic Procedures**

505 Insulin measurements from plasma and pancreatic extracts were measured by ELISA (Crystal Chem), blood glucose  
506 and luciferase assays were measured as described (Poy *et al.*, 2009). Islet morphometric analysis was performed on  
507 8µm sections of paraffin-embedded pancreas approximately 150-200 µm apart. Sections were dewaxed, washed, and  
508 stained for insulin (Dako A0564), glucagon (Millipore MABN238), Ki-67 (NovaCastra), or TUNEL (Roche cat. no.  
509 11684795910). Cell numbers from all islets in 3-7 sections were counted with ImageJ software from 20X images  
510 obtained using a Nikon AIRSI Spectral Confocal Microscope. In vivo insulin release and glucose (GTT) tolerance  
511 tests were performed following a 6-hour fast and intraperitoneally injection of glucose (2g/kg BW). Insulin secretion  
512 from isolated islets was performed as described (Poy *et al.*, 2009).

513

#### 514 **Cell Culture, immunoprecipitation, and western blotting antibodies**

515 MIN6 cells were cultured in DMEM (Invitrogen) containing 4.5g/L glucose supplemented with 15% v/v heat-  
516 inactivated FCS, 50 µM β-mercaptoethanol, and 50 mg/mL penicillin and 100 mg/ml streptomycin and insulin release  
517 was performed as described (Poy *et al.*, 2004). The following primary antibodies were used for Western blots at

518 1:1000 dilution: PITPNA (Abcam, ab180234), Cadm1 (MBL, CM004-3), Gephyrin (BD Biosciences, 610585),  
519 CHOP (Cell Signaling, 2895S), BiP/GRP78 (Cell Signaling, 3177S), DRP1 (Proteintech, 12957-1-AP),  $\beta$ -Actin (Cell  
520 Signaling, 3700S), and  $\gamma$ -Tubulin (Sigma, T6557). The following primary antibodies were used for  
521 immunofluorescence: PITPNA (1:200, Sigma, SAB1400211). Antibodies were used on paraffin-embedded pancreata  
522 fixed in 4% paraformaldehyde for 3 hours. Image densitometry of 16-bit TIF images for all Western blots was  
523 performed using ImageJ. MicroRNA mimics and siRNA pools were purchased from Qiagen GmbH (Germany) and  
524 scrambled pool controls are defined as an equimolar stock solution of either 48 random siRNA sequences, or 12  
525 unique mimics of miRNAs not expressed in the beta-cell (i.e. miR-122, miR-1) and not predicted by the TargetScan  
526 algorithm to bind the 3'UTR of *Pitpna*. For biochemical fractionation, an eight-step sucrose gradient was performed  
527 on MIN6 cells as described previously (Tattikota *et al.*, 2013). Briefly, MIN6 cells were washed, pelleted, and  
528 resuspended in buffer containing 5 mM HEPES, 0.5 mM EGTA, and 1X Complete Protease inhibitors (Roche  
529 Applied Science) at pH 7.4 and homogenized. Homogenate was spun at 3000 X g for 10 min at 4 °C, and the post-  
530 nuclear supernatant was loaded onto an 8-step discontinuous sucrose density gradient (HEPES-buffered 0.2–2 M  
531 sucrose) and centrifuged at 55,000 rpm for 2h at 4 °C using an MLS50 rotor (Beckman Coulter). Extracellular  
532 acidification rate (ECAR) and oxygen consumption rate (OCR) were measured in MIN6 cells using an XF24  
533 Analyzer (Seahorse Bioscience, MA, USA).

534

### 535 **Lentiviral-mediated over-expression and knockdown in isolated human islets**

536 Lentiviruses were generated after subcloning the *PITPNA* cDNA sequence into the expression vector pCCL-cPPT-  
537 PGK-IRES-WPRE (Addgene). The resulting construct was transfected along with packaging plasmids pMD2.G and  
538 pSPAX2 (Addgene) into HEK293T cells. Cell culture media containing the virus was collected 48 and 72 hours after  
539 transfection, concentrated and stored at -80°C. Knockdown of *PITPNA* by MISSION shRNA vectors (Sigma-  
540 Aldrich) was confirmed in human pancreatic 1.1B4 cells and isolated islets. Human islets were treated with non-  
541 overlapping shRNAs against the human *PITPNA* mRNA (accession number NM\_006224), and TRCN00000299703  
542 (SHCLNV 06302009MN) was used for all studies. TRC2 pLKO.5 Lentiviral Transduction Particles (pLKO.5-puro  
543 non-Mammalian shRNA Control Plasmid DNA; SHC00204V) were used to treat control human islets. Polybrene  
544 (Santa Cruz Biotechnology, Cat# sc-134220, Texas, USA) was added to the media with the final concentration of 10  
545  $\mu$ g/ml before infection. In brief, 250 islet equivalents (IEQ) seeded in each 12-well plate were infected with each  
546 lentivirus at an M.O.I of 20 for 48-72 hours to ensure complete infection.

547

### 548 **Total internal reflection fluorescence (TIRF) microscopy**

549 For TIRF microscopy experiments, human islets were obtained from the Nordic Network for Clinical Islet  
550 Transplantation, Uppsala Sweden, with ethical clearance (Uppsala Regional Ethics Board 2006/348) and the donor  
551 families' written informed consent. Islets (donor IDs R442, 2583, 2585) were dispersed into single cells in cell  
552 dissociation buffer (Thermo Fisher Scientific) supplemented with trypsin (0.005%, Life Technologies), washed and  
553 plated in serum-containing medium on 22-mm polylysine-coated coverslips, allowed to settle overnight, and then

554 transduced with adenovirus coding for the granule marker NPY-tdmOrange2. Cells were imaged as described  
555 previously (Gandasi *et al.*, 2018) using a lens-type total internal reflection (TIRF) microscope, based on an  
556 AxioObserver Z1 with a 100x/1.46 objective (Carl Zeiss). TIRF illumination with a decay constant of ~100 nm  
557 (calculated based on exit angle) was created using two DPSS lasers at 491 and 561 nm (Cobolt, Stockholm, Sweden)  
558 that passed through a cleanup filter (zet405/488/561/640x, Chroma) and was controlled with an acousto-optical  
559 tunable filter (AA-Opto, France). Excitation and emission light were separated using a beamsplitter  
560 (ZT405/488/561/640rpc, Chroma) and the emission light chromatically separated (QuadView, Roper) onto separate  
561 areas of an EMCCD camera (QuantEM 512SC, Roper) with a cutoff at 565 nm (565dcxr, Chroma) and emission  
562 filters (ET525/50m and 600/50m, Chroma). Scaling was 160 nm per pixel. Cells were imaged in (mM) 138 NaCl,  
563 5.6 KCl, 1.2 MgCl<sub>2</sub>, 2.6 CaCl<sub>2</sub>, 0.2 diazoxide (to prevent spontaneous depolarizations), 10 D-glucose, 5 HEPES (pH  
564 7.4 with NaOH) at ~35°C. Exocytosis was evoked with high 75 mM K<sup>+</sup> (equimolarly replacing Na<sup>+</sup>), applied by  
565 computer-timed local pressure ejection through a pulled glass capillary. Exocytosis events were identified manually  
566 based on the characteristic rapid loss of the granule marker fluorescence (1-2 frames).

567

#### 568 **Phosphoinositide determinations and quantitation.**

569 Phospholipids were extracted and analyzed by the standard procedure as described (de la Cruz *et al.*, 2020; Traynor-  
570 Kaplan *et al.*, 2017). Briefly, adherent human islets were washed with PBS and collected from 6 well plates then  
571 transfer into Lo-Bind polypropylene tubes followed by centrifuged at 30,000 g for 1 min at 4°C. After removing the  
572 PBS, 0.5 M TCA was added to the pellet, vortexed, and incubated on ice for 10 min. The cooled mixture (TCA and  
573 islets) was centrifuged at 30,000 g for 3 min at 4°C and discarded the supernatant. Finally, added 5% (w/v) TCA  
574 containing 10 mM EDTA to the pellet and vortexed, and then stored at -80°C. Internal standards of PtdIns(4,5)P<sub>2</sub>,  
575 PtdIns(4)P, and PtdIns were added to the precipitates. The lipid analytical internal standards were ammonium salts  
576 from Avanti Polar Lipids (LIPID MAPS MS Standards). For lipid extraction, added samples with ice-cold  
577 chloroform-methanol- 12.1 N HCl (40:80:1). The organic layer was then separated and evaporated. The dried extracts  
578 were derivatized (methylated) with TMS-DM and quantified by targeted analysis as described (Traynor-Kaplan *et*  
579 *al.*, 2017). Summary of mass spectrometry data presented in Table S3.

580

#### 581 **Analysis of intracellular calcium.**

582 Intracellular calcium [ $Ca^{+2}$ ] assay was performed (Fluo-4NW Invitrogen, F36206, excitation 494 nm, emission  
583 516 nm) according to the manufacturer's instructions. Briefly, [ $Ca^{+2}$ ] was recorded for 60-90 s after addition of the  
584 KCl. Human islets were fixed in black 96-well optical bottom plates with poly-D-lysine coating. After the dye loading  
585 for an hour, the recording was done under confocal microscope (40x objective) at room temp using an excitation  
586 filter of 488 nm. Fold change [ $Ca^{+2}$ ] was calculated from the baseline fluorescence recorded during the first 5 s before  
587 the addition of KCl. Images were captured at 1 s intervals for up to 60 s and the intracellular free calcium  
588 concentration is represented by mean fluorescence intensity.

589



590 **Immunostaining and confocal microscopy.**

591 The following primary antibodies were used for immunofluorescence: anti-GOLPH3 (1:1000, Abcam, ab98023),  
592 anti-Golgin97 (1:100, Invitrogen, A-21270), anti-PtdIns-4-P (1:500, Echelon Biosciences cat. no. Z-P004), and anti-  
593 insulin (1:1000, Dako cat.no A0564). For immunostaining, both primary and secondary antibodies were diluted in 1x  
594 PBS containing 2.5% bovine serum albumin and 0.2% Triton-X-100. Antibody incubation steps (primary antibody:  
595 3-4 hrs; secondary antibody: 1hr) were performed in a humidified chamber protected from direct light. Alexa Fluor  
596 488, 594, 647 anti-rabbit, anti-mouse or anti-guinea pig secondary antibodies used in this study are listed in Table  
597 S2. Cell nuclei were stained with DAPI and mounted with Fluorsave reagent (MilliporeSigma, 345789) for  
598 fluorescence microscopy. Confocal images were acquired on a Nikon TiE confocal microscope using the NIS-  
599 Elements software with 60x oil immersion objective. Images were imported into the *Fiji* version (<http://fiji.sc>) of the  
600 *ImageJ* software and the colocalization analyses were performed using the Coloc2 plugin  
601 (<https://imagej.net/plugins/coloc-2>) -- an automated system that evaluates the fluorescent intensities of every pixel  
602 within an area of interest. Quantification of colocalization was performed using Pearson's correlation coefficient. The  
603 Pearson's correlation coefficient reflects the degree of linear relationship between two variables; in this case, the  
604 fluorescence intensities of two fluorescently tagged proteins GOLPH3 and Golgin97.

605  
606 **Transmission electron microscopy (TEM).**

607 Isolated mouse islets and MIN6 cells were fixed in 2% paraformaldehyde/2.5% glutaraldehyde in 0.1M Sodium  
608 Cacodylate buffer (cat. no. 15960-01 Electron Microscopy Sciences) for 2 hours at 4°C and then stained in 1.0%  
609 osmium tetroxide (cat. no. 19100 Electron Microscopy Sciences) for 1 hour. After dehydrated in ethanol, cells were  
610 embedded with Spurr's Low Viscosity Embedding Kit (cat. no. EM0300-1KT, Electron Microscopy Sciences),  
611 sectioned (70-90 nm thick), placed on Formvar (200 mesh) copper grids and contrasted with uranyl acetate (cat. no.  
612 22409 Electron Microscopy Sciences) and lead citrate (cat. no. 22410 Electron Microscopy Sciences). Imaging was  
613 performed on a Philips Morgagni transmission electron microscope and acquired images were analyzed with respect  
614 to insulin granule and mitochondrial morphology.

615  
616 **Lipid extraction and mass spectrometric analysis.**

617 Cells were harvested by trypsinization and washed twice with ice-cold PBS. A modified protocol of Bligh & Dyer  
618 was used to extract lipids from cells (Bligh and Dyer, 1959). Briefly, 900µL of chloroform:methanol (1:2, v:v)  
619 (Thermo Fisher) was added to  $2 \times 10^6$  cells. After vortexing for 1 minute and incubating for 15 minutes on ice, 300µL  
620 of chloroform was added to the mixture, followed by mild vortexing and addition of 300µL distilled water. The  
621 mixture was vortexed for 2 minutes and centrifuged at 14,4000 rpm for 2 minutes at 4°C. The lipids were isolated  
622 from the lower organic phase. The sample was vacuum dried (Thermo Savant SPD SpeedVac) and the dried extract  
623 resuspended in 200µL of chloroform:methanol (1:2, v/v) containing standards: PC 28:0, PE 28:0, PI 25:0, PG 28:0,  
624 PA 28:0, PS 28:0, LPC 17:0, LPE 14:0, d<sub>6</sub>-CE 18:0 and d<sub>5</sub>-TAG 48:0 (Avanti Polar Lipids). Phospholipids and neutral

625 lipids were analyzed on an Agilent 1290 HPLC system coupled with an Agilent Triple Quadrupole mass spectrometer  
626 6460, using Zorbax Eclipse Plus C18 column, 2.1×50mm, 1.8µm. The mobile phases were: A (acetonitrile:10mM  
627 ammonium formate, 40:60) and B (acetonitrile:10mM ammonium formate, 90:10). For phospholipids separation the  
628 gradient was as follows: start at 20% B, to 60% B in 2min, to 100% B in 5min, hold at 100% B for 2 min, back to  
629 20% B in 0.01 min, hold 20% B 1.79 min (total runtime 10.8mins), the flow rate was 0.4 mL/min and the column  
630 temperature 30°C. For neutral lipids separation the gradient was as follows: start at 20% B, to 75% B in 2min, to  
631 100% B in 4min, hold at 100% B for 3 min, back to 20% B in 0.01 min, hold 20% B 1.79 min (total runtime  
632 10.8mins), the flow rate was 0.4 mL/min and the column temperature 40°C. Positive and negative electrospray  
633 ionization (ESI) was undertaken using the following parameters: gas temperature, 300°C; gas flow, 5 l/min; nebulizer,  
634 45 psi; sheath gas temperature, 250°C; and sheath gas flow, 11 l/min; capillary voltage, 3.5 kV. Phospholipids and  
635 neutral lipids were measured using multiple reaction monitoring (MRM), details can be found in Table S3. Each  
636 biological replicate was measured twice and the average measurement used for analysis. Identification of peaks were  
637 based on retention time (RT) and specific MRM transitions for each lipid. Raw peak areas were integrated using  
638 Agilent MassHunter Quantitative Analysis software. Individual lipid species were quantified by comparison with  
639 spiked internal standards. The molar fractions of individual lipid species and each lipid class were normalized to total  
640 lipids as follows: individual lipid intensities were divided by the relevant internal standard's intensity and multiplied  
641 by the standard's concentration; the obtained concentration value was divided by the sum of all lipids concentrations  
642 to yield molar fractions (mol%).

643

#### 644 **Statistical analysis.**

645 All results are expressed as mean ± standard error (SEM) and statistical analysis is summarized in Table S2. A P-  
646 value of less than or equal to 0.05 was considered statistically significant. \* $P < 0.05$ , \*\* $P < 0.01$ , and \*\*\* $P < 0.001$ . All  
647 graphical and statistical analyses were performed using the Prism8 software (Graphpad Software, USA) and  
648 Microsoft Excel. Comparisons between data sets with two groups were evaluated using an unpaired Student's t test.  
649 ANOVA analysis was performed for comparisons of three or more groups.

650

#### 651 **ACKNOWLEDGEMENTS**

652 The authors thank David Castle, T. Osborne, L. Nagy, and M. Elena-Arango for assistance in the conduct of this  
653 work. This work was funded by Johns Hopkins All Children's Hospital (M.N.P.), NIH grant R35 GM131804  
654 (V.A.B.), the Helmholtz Gemeinschaft (M.N.P.), two European Foundation for the Study of Diabetes EFSD/Lilly  
655 Programme Grants (M.N.P. and S.B.), Swedish Science Council (S.B.), NovoNordisk Foundation (S.B.), and the  
656 Deutsche Forschungsgemeinschaft (YA 721/3-1 to X.Y.).

#### 657 **AUTHOR CONTRIBUTIONS**

658 Y.T.Y. and C.S. performed the primary expression analysis, animal husbandry, electron microscopy image analysis,  
659 immunohistochemical, and morphometric analysis and edited the manuscript. X.Y., Y.W., J.S., S.K., S.N., and A.A,

660 performed expression analysis. L.L. and S.B. performed TIRF microscopy and edited the manuscript. A.P. and M.M.  
661 performed immunohistochemical analysis. A.G. and F.v.M. reanalyzed public expression datasets. Y.W., A.C-G. and  
662 M.W. performed and analyzed the lipidomic analysis. A.T.K. quantified phosphoinositides. P.A. edited the  
663 manuscript. Z.X and V.A.B. developed and provided the *Pitpna* mutant animal lines and edited the manuscript.  
664 M.N.P. conceived and designed the study, wrote the manuscript, and is the guarantor of this work and takes  
665 responsibility for the integrity of the data and the accuracy of the data analysis. All authors contributed to  
666 interpretation of the data and approved the final version of this manuscript.

667

## 668 **DECLARATIONS OF INTERSTS**

669 The authors declare no competing interests.

670

## 671 **REFERENCES**

672

673 Agarwal, V., Subtelny, A.O., Thiru, P., Ulitsky, I., and Bartel, D.P. (2018). Predicting microRNA targeting efficacy  
674 in *Drosophila*. *Genome Biol* 19, 152. [10.1186/s13059-018-1504-3](https://doi.org/10.1186/s13059-018-1504-3).

675 Alb, J.G., Jr., Cortese, J.D., Phillips, S.E., Albin, R.L., Nagy, T.R., Hamilton, B.A., and Bankaitis, V.A. (2003).  
676 Mice lacking phosphatidylinositol transfer protein-alpha exhibit spinocerebellar degeneration, intestinal and hepatic  
677 steatosis, and hypoglycemia. *J Biol Chem* 278, 33501-33518. [10.1074/jbc.M303591200](https://doi.org/10.1074/jbc.M303591200).

678 Alb, J.G., Jr., Gedvilaite, A., Cartee, R.T., Skinner, H.B., and Bankaitis, V.A. (1995). Mutant rat  
679 phosphatidylinositol/phosphatidylcholine transfer proteins specifically defective in phosphatidylinositol transfer:  
680 implications for the regulation of phospholipid transfer activity. *Proc Natl Acad Sci U S A* 92, 8826-8830.  
681 [10.1073/pnas.92.19.8826](https://doi.org/10.1073/pnas.92.19.8826).

682 Alb, J.G., Jr., Phillips, S.E., Wilfley, L.R., Philpot, B.D., and Bankaitis, V.A. (2007). The pathologies associated  
683 with functional titration of phosphatidylinositol transfer protein alpha activity in mice. *J Lipid Res* 48, 1857-1872.  
684 [10.1194/jlr.M700145-JLR200](https://doi.org/10.1194/jlr.M700145-JLR200).

685 Alejandro, E.U., Gregg, B., Blandino-Rosano, M., Cras-Meneur, C., and Bernal-Mizrachi, E. (2015). Natural  
686 history of beta-cell adaptation and failure in type 2 diabetes. *Mol Aspects Med* 42, 19-41.  
687 [10.1016/j.mam.2014.12.002](https://doi.org/10.1016/j.mam.2014.12.002).

688 Arunagiri, A., Haataja, L., Cunningham, C.N., Shrestha, N., Tsai, B., Qi, L., Liu, M., and Arvan, P. (2018).  
689 Misfolded proinsulin in the endoplasmic reticulum during development of beta cell failure in diabetes. *Ann N Y*  
690 *Acad Sci* 1418, 5-19. [10.1111/nyas.13531](https://doi.org/10.1111/nyas.13531).

691 Arunagiri, A., Haataja, L., Pottekat, A., Pamenan, F., Kim, S., Zeltser, L.M., Paton, A.W., Paton, J.C., Tsai, B.,  
692 Itkin-Ansari, P., et al. (2019). Proinsulin misfolding is an early event in the progression to type 2 diabetes. *Elife* 8.  
693 [10.7554/eLife.44532](https://doi.org/10.7554/eLife.44532).

694 Ashlin, T.G., Blunsom, N.J., and Cockcroft, S. (2021). Courier service for phosphatidylinositol: PITPs deliver on  
695 demand. *Biochim Biophys Acta Mol Cell Biol Lipids* 1866, 158985. [10.1016/j.bbalip.2021.158985](https://doi.org/10.1016/j.bbalip.2021.158985).

696 Back, S.H., and Kaufman, R.J. (2012). Endoplasmic reticulum stress and type 2 diabetes. *Annu Rev Biochem* 81,  
697 767-793. [10.1146/annurev-biochem-072909-095555](https://doi.org/10.1146/annurev-biochem-072909-095555).

- 698 Balla, T. (2013). Phosphoinositides: tiny lipids with giant impact on cell regulation. *Physiol Rev* 93, 1019-1137.  
699 10.1152/physrev.00028.2012.
- 700 Bankaitis, V.A., Aitken, J.R., Cleves, A.E., and Dowhan, W. (1990). An essential role for a phospholipid transfer  
701 protein in yeast Golgi function. *Nature* 347, 561-562. 10.1038/347561a0.
- 702 Bankaitis, V.A., Garcia-Mata, R., and Mousley, C.J. (2012). Golgi membrane dynamics and lipid metabolism. *Curr*  
703 *Biol* 22, R414-424. 10.1016/j.cub.2012.03.004.
- 704 Bankaitis, V.A., Mousley, C.J., and Schaaf, G. (2010). The Sec14 superfamily and mechanisms for crosstalk  
705 between lipid metabolism and lipid signaling. *Trends Biochem Sci* 35, 150-160. 10.1016/j.tibs.2009.10.008.
- 706 Behnia, R., and Munro, S. (2005). Organelle identity and the signposts for membrane traffic. *Nature* 438, 597-604.  
707 10.1038/nature04397.
- 708 Bligh, E.G., and Dyer, W.J. (1959). A rapid method of total lipid extraction and purification. *Can J Biochem*  
709 *Physiol* 37, 911-917. 10.1139/o59-099.
- 710 Bock, F.J., and Tait, S.W.G. (2020). Mitochondria as multifaceted regulators of cell death. *Nat Rev Mol Cell Biol*  
711 21, 85-100. 10.1038/s41580-019-0173-8.
- 712 Bridges, D., and Saltiel, A.R. (2012). Phosphoinositides in insulin action and diabetes. *Curr Top Microbiol*  
713 *Immunol* 362, 61-85. 10.1007/978-94-007-5025-8\_3.
- 714 Campbell, J.E., and Newgard, C.B. (2021). Mechanisms controlling pancreatic islet cell function in insulin  
715 secretion. *Nat Rev Mol Cell Biol* 22, 142-158. 10.1038/s41580-020-00317-7.
- 716 Chen, C., Cohrs, C.M., Stertmann, J., Bozsak, R., and Speier, S. (2017). Human beta cell mass and function in  
717 diabetes: Recent advances in knowledge and technologies to understand disease pathogenesis. *Mol Metab* 6, 943-  
718 957. 10.1016/j.molmet.2017.06.019.
- 719 Cleves, A.E., McGee, T.P., Whitters, E.A., Champion, K.M., Aitken, J.R., Dowhan, W., Goebel, M., and Bankaitis,  
720 V.A. (1991). Mutations in the CDP-choline pathway for phospholipid biosynthesis bypass the requirement for an  
721 essential phospholipid transfer protein. *Cell* 64, 789-800. 10.1016/0092-8674(91)90508-v.
- 722 Cruz-Garcia, D., Ortega-Bellido, M., Scarpa, M., Villeneuve, J., Jovic, M., Porzner, M., Balla, T., Seufferlein, T.,  
723 and Malhotra, V. (2013). Recruitment of arfaptins to the trans-Golgi network by PI(4)P and their involvement in  
724 cargo export. *EMBO J* 32, 1717-1729. 10.1038/emboj.2013.116.
- 725 De Camilli, P., Emr, S.D., McPherson, P.S., and Novick, P. (1996). Phosphoinositides as regulators in membrane  
726 traffic. *Science* 271, 1533-1539. 10.1126/science.271.5255.1533.
- 727 de la Cruz, L., Traynor-Kaplan, A., Vivas, O., Hille, B., and Jensen, J.B. (2020). Plasma membrane processes are  
728 differentially regulated by type I phosphatidylinositol phosphate 5-kinases and RASSF4. *J Cell Sci* 133.  
729 10.1242/jcs.233254.
- 730 Di Paolo, G., and De Camilli, P. (2006). Phosphoinositides in cell regulation and membrane dynamics. *Nature* 443,  
731 651-657. 10.1038/nature05185.
- 732 Dickeson, S.K., Lim, C.N., Schuyler, G.T., Dalton, T.P., Helmkamp, G.M., Jr., and Yarbrough, L.R. (1989).  
733 Isolation and sequence of cDNA clones encoding rat phosphatidylinositol transfer protein. *J Biol Chem* 264, 16557-  
734 16564.

- 735 Eizirik, D.L., Pasquali, L., and Cnop, M. (2020). Pancreatic beta-cells in type 1 and type 2 diabetes mellitus:  
736 different pathways to failure. *Nat Rev Endocrinol* *16*, 349-362. 10.1038/s41574-020-0355-7.
- 737 Fadista, J., Vikman, P., Laakso, E.O., Mollet, I.G., Esguerra, J.L., Taneera, J., Storm, P., Osmark, P., Ladenvall, C.,  
738 Prasad, R.B., et al. (2014). Global genomic and transcriptomic analysis of human pancreatic islets reveals novel  
739 genes influencing glucose metabolism. *Proc Natl Acad Sci U S A* *111*, 13924-13929. 10.1073/pnas.1402665111.
- 740 Ferrannini, E. (2010). The stunned beta cell: a brief history. *Cell Metab* *11*, 349-352. 10.1016/j.cmet.2010.04.009.
- 741 Fonseca, S.G., Gromada, J., and Urano, F. (2011). Endoplasmic reticulum stress and pancreatic beta-cell death.  
742 *Trends Endocrinol Metab* *22*, 266-274. 10.1016/j.tem.2011.02.008.
- 743 Friedman, J.R., Lackner, L.L., West, M., DiBenedetto, J.R., Nunnari, J., and Voeltz, G.K. (2011). ER tubules mark  
744 sites of mitochondrial division. *Science* *334*, 358-362. 10.1126/science.1207385.
- 745 Fullwood, Y., dos Santos, M., and Hsuan, J.J. (1999). Cloning and characterization of a novel human  
746 phosphatidylinositol transfer protein, rdgBbeta. *J Biol Chem* *274*, 31553-31558. 10.1074/jbc.274.44.31553.
- 747 Gandasi, N.R., Yin, P., Omar-Hmeadi, M., Ottosson Laakso, E., Vikman, P., and Barg, S. (2018). Glucose-  
748 Dependent Granule Docking Limits Insulin Secretion and Is Decreased in Human Type 2 Diabetes. *Cell Metab* *27*,  
749 470-478 e474. 10.1016/j.cmet.2017.12.017.
- 750 Grabon, A., Bankaitis, V.A., and McDermott, M.I. (2019). The interface between phosphatidylinositol transfer  
751 protein function and phosphoinositide signaling in higher eukaryotes. *J Lipid Res* *60*, 242-268.  
752 10.1194/jlr.R089730.
- 753 Hammond, G.R., Fischer, M.J., Anderson, K.E., Holdich, J., Koteci, A., Balla, T., and Irvine, R.F. (2012). PI4P and  
754 PI(4,5)P2 are essential but independent lipid determinants of membrane identity. *Science* *337*, 727-730.  
755 10.1126/science.1222483.
- 756 Harding, H.P., and Ron, D. (2002). Endoplasmic reticulum stress and the development of diabetes: a review.  
757 *Diabetes* *51 Suppl 3*, S455-461. 10.2337/diabetes.51.2007.s455.
- 758 Hay, J.C., and Martin, T.F. (1993). Phosphatidylinositol transfer protein required for ATP-dependent priming of  
759 Ca(2+)-activated secretion. *Nature* *366*, 572-575. 10.1038/366572a0.
- 760 Haythorne, E., Rohm, M., van de Bunt, M., Brereton, M.F., Tarasov, A.I., Blacker, T.S., Sachse, G., Silva Dos  
761 Santos, M., Terron Exposito, R., Davis, S., et al. (2019). Diabetes causes marked inhibition of mitochondrial  
762 metabolism in pancreatic beta-cells. *Nat Commun* *10*, 2474. 10.1038/s41467-019-10189-x.
- 763 Helmkamp, G.M., Jr., Harvey, M.S., Wirtz, K.W., and Van Deenen, L.L. (1974). Phospholipid exchange between  
764 membranes. Purification of bovine brain proteins that preferentially catalyze the transfer of phosphatidylinositol. *J*  
765 *Biol Chem* *249*, 6382-6389.
- 766 Hennings, T.G., Chopra, D.G., DeLeon, E.R., VanDeusen, H.R., Sesaki, H., Merrins, M.J., and Ku, G.M. (2018). In  
767 Vivo Deletion of beta-Cell Drp1 Impairs Insulin Secretion Without Affecting Islet Oxygen Consumption.  
768 *Endocrinology* *159*, 3245-3256. 10.1210/en.2018-00445.
- 769 Hokin, M.R., and Hokin, L.E. (1953). Enzyme secretion and the incorporation of P32 into phospholipides of  
770 pancreas slices. *J Biol Chem* *203*, 967-977.
- 771 Kim, D., Langmead, B., and Salzberg, S.L. (2015). HISAT: a fast spliced aligner with low memory requirements.  
772 *Nat Methods* *12*, 357-360. 10.1038/nmeth.3317.

- 773 Kuna, R.S., and Field, S.J. (2019). GOLPH3: a Golgi phosphatidylinositol(4)phosphate effector that directs vesicle  
774 trafficking and drives cancer. *J Lipid Res* 60, 269-275. 10.1194/jlr.R088328.
- 775 LaPierre, M.P., and Stoffel, M. (2017). MicroRNAs as stress regulators in pancreatic beta cells and diabetes. *Mol*  
776 *Metab* 6, 1010-1023. 10.1016/j.molmet.2017.06.020.
- 777 Lete, M.G., Tripathi, A., Chandran, V., Bankaitis, V.A., and McDermott, M.I. (2020). Lipid transfer proteins and  
778 instructive regulation of lipid kinase activities: Implications for inositol lipid signaling and disease. *Adv Biol Regul*  
779 78, 100740. 10.1016/j.jbior.2020.100740.
- 780 Liesa, M., and Shirihai, O.S. (2013). Mitochondrial dynamics in the regulation of nutrient utilization and energy  
781 expenditure. *Cell Metab* 17, 491-506. 10.1016/j.cmet.2013.03.002.
- 782 Liu, M., Huang, Y., Xu, X., Li, X., Alam, M., Arunagiri, A., Haataja, L., Ding, L., Wang, S., Itkin-Ansari, P., et al.  
783 (2021). Normal and defective pathways in biogenesis and maintenance of the insulin storage pool. *J Clin Invest*  
784 131. 10.1172/JCI142240.
- 785 MacDonald, M.J., Ade, L., Ntambi, J.M., Ansari, I.U., and Stoker, S.W. (2015). Characterization of phospholipids  
786 in insulin secretory granules and mitochondria in pancreatic beta cells and their changes with glucose stimulation. *J*  
787 *Biol Chem* 290, 11075-11092. 10.1074/jbc.M114.628420.
- 788 Marciniak, S.J., Yun, C.Y., Oyadomari, S., Novoa, I., Zhang, Y., Jungreis, R., Nagata, K., Harding, H.P., and Ron,  
789 D. (2004). CHOP induces death by promoting protein synthesis and oxidation in the stressed endoplasmic  
790 reticulum. *Genes Dev* 18, 3066-3077. 10.1101/gad.1250704.
- 791 Martin, T.F. (1998). Phosphoinositide lipids as signaling molecules: common themes for signal transduction,  
792 cytoskeletal regulation, and membrane trafficking. *Annu Rev Cell Dev Biol* 14, 231-264.  
793 10.1146/annurev.cellbio.14.1.231.
- 794 Mishra, P., and Chan, D.C. (2014). Mitochondrial dynamics and inheritance during cell division, development and  
795 disease. *Nat Rev Mol Cell Biol* 15, 634-646. 10.1038/nrm3877.
- 796 Mousley, C.J., Tyeryar, K., Ile, K.E., Schaaf, G., Brost, R.L., Boone, C., Guan, X., Wenk, M.R., and Bankaitis,  
797 V.A. (2008). Trans-Golgi network and endosome dynamics connect ceramide homeostasis with regulation of the  
798 unfolded protein response and TOR signaling in yeast. *Mol Biol Cell* 19, 4785-4803. 10.1091/mbc.E08-04-0426.
- 799 Muoio, D.M., and Newgard, C.B. (2008). Mechanisms of disease: Molecular and metabolic mechanisms of insulin  
800 resistance and beta-cell failure in type 2 diabetes. *Nat Rev Mol Cell Biol* 9, 193-205. 10.1038/nrm2327.
- 801 Muraro, M.J., Dharmadhikari, G., Grun, D., Groen, N., Dielen, T., Jansen, E., van Gurp, L., Engelse, M.A.,  
802 Carlotti, F., de Koning, E.J., and van Oudenaarden, A. (2016). A Single-Cell Transcriptome Atlas of the Human  
803 Pancreas. *Cell Syst* 3, 385-394 e383. 10.1016/j.cels.2016.09.002.
- 804 Nagashima, S., Tabara, L.C., Tilokani, L., Paupe, V., Anand, H., Pogson, J.H., Zunino, R., McBride, H.M., and  
805 Prudent, J. (2020). Golgi-derived PI(4)P-containing vesicles drive late steps of mitochondrial division. *Science* 367,  
806 1366-1371. 10.1126/science.aax6089.
- 807 Nguyen, P.M., Gandasi, N.R., Xie, B., Sugahara, S., Xu, Y., and Idevall-Hagren, O. (2019). The PI(4)P  
808 phosphatase Sac2 controls insulin granule docking and release. *J Cell Biol* 218, 3714-3729.  
809 10.1083/jcb.201903121.
- 810 Nolan, C.J., and Prentki, M. (2019). Insulin resistance and insulin hypersecretion in the metabolic syndrome and  
811 type 2 diabetes: Time for a conceptual framework shift. *Diab Vasc Dis Res* 16, 118-127.  
812 10.1177/1479164119827611.

- 813 Ohashi, M., Jan de Vries, K., Frank, R., Snoek, G., Bankaitis, V., Wirtz, K., and Huttner, W.B. (1995). A role for  
814 phosphatidylinositol transfer protein in secretory vesicle formation. *Nature* 377, 544-547. 10.1038/377544a0.
- 815 Omar-Hmeadi, M., and Idevall-Hagren, O. (2021). Insulin granule biogenesis and exocytosis. *Cell Mol Life Sci* 78,  
816 1957-1970. 10.1007/s00018-020-03688-4.
- 817 Porksen, N., Hollingdal, M., Juhl, C., Butler, P., Veldhuis, J.D., and Schmitz, O. (2002). Pulsatile insulin secretion:  
818 detection, regulation, and role in diabetes. *Diabetes* 51 Suppl 1, S245-254. 10.2337/diabetes.51.2007.s245.
- 819 Poy, M.N. (2016). MicroRNAs: An adaptive mechanism in the pancreatic beta-cell...and beyond? *Best Pract Res*  
820 *Clin Endocrinol Metab* 30, 621-628. 10.1016/j.beem.2016.07.003.
- 821 Poy, M.N., Eliasson, L., Krutzfeldt, J., Kuwajima, S., Ma, X., Macdonald, P.E., Pfeffer, S., Tuschl, T., Rajewsky,  
822 N., Rorsman, P., and Stoffel, M. (2004). A pancreatic islet-specific microRNA regulates insulin secretion. *Nature*  
823 432, 226-230. 10.1038/nature03076.
- 824 Poy, M.N., Hausser, J., Trajkovski, M., Braun, M., Collins, S., Rorsman, P., Zavolan, M., and Stoffel, M. (2009).  
825 miR-375 maintains normal pancreatic alpha- and beta-cell mass. *Proc Natl Acad Sci U S A* 106, 5813-5818.  
826 10.1073/pnas.0810550106.
- 827 Rameh, L.E., and Deeney, J.T. (2016). Phosphoinositide signalling in type 2 diabetes: a beta-cell perspective.  
828 *Biochem Soc Trans* 44, 293-298. 10.1042/BST20150229.
- 829 Rhodes, C.J. (2005). Type 2 diabetes-a matter of beta-cell life and death? *Science* 307, 380-384.  
830 10.1126/science.1104345.
- 831 Rohm, T.V., Meier, D.T., Olefsky, J.M., and Donath, M.Y. (2022). Inflammation in obesity, diabetes, and related  
832 disorders. *Immunity* 55, 31-55. 10.1016/j.immuni.2021.12.013.
- 833 Schaaf, G., Ortlund, E.A., Tyeryar, K.R., Mousley, C.J., Ile, K.E., Garrett, T.A., Ren, J., Woolls, M.J., Raetz, C.R.,  
834 Redinbo, M.R., and Bankaitis, V.A. (2008). Functional anatomy of phospholipid binding and regulation of  
835 phosphoinositide homeostasis by proteins of the sec14 superfamily. *Mol Cell* 29, 191-206.  
836 10.1016/j.molcel.2007.11.026.
- 837 Shrestha, N., De Franco, E., Arvan, P., and Cnop, M. (2021). Pathological beta-Cell Endoplasmic Reticulum Stress  
838 in Type 2 Diabetes: Current Evidence. *Front Endocrinol (Lausanne)* 12, 650158. 10.3389/fendo.2021.650158.
- 839 Sidarala, V., Pearson, G.L., Parekh, V.S., Thompson, B., Christen, L., Gingerich, M.A., Zhu, J., Stromer, T., Ren,  
840 J., Reck, E.C., et al. (2020). Mitophagy protects beta cells from inflammatory damage in diabetes. *JCI Insight* 5.  
841 10.1172/jci.insight.141138.
- 842 Smirnova, E., Griparic, L., Shurland, D.L., and van der Bliek, A.M. (2001). Dynamin-related protein Drp1 is  
843 required for mitochondrial division in mammalian cells. *Mol Biol Cell* 12, 2245-2256. 10.1091/mbc.12.8.2245.
- 844 Song, B., Scheuner, D., Ron, D., Pennathur, S., and Kaufman, R.J. (2008). Chop deletion reduces oxidative stress,  
845 improves beta cell function, and promotes cell survival in multiple mouse models of diabetes. *J Clin Invest* 118,  
846 3378-3389. 10.1172/JCI34587.
- 847 Stephens, L.R., Jackson, T.R., and Hawkins, P.T. (1993). Agonist-stimulated synthesis of  
848 phosphatidylinositol(3,4,5)-trisphosphate: a new intracellular signalling system? *Biochim Biophys Acta* 1179, 27-  
849 75. 10.1016/0167-4889(93)90072-w.

- 850 Stuart, T., Butler, A., Hoffman, P., Hafemeister, C., Papalexi, E., Mauck, W.M., 3rd, Hao, Y., Stoeckius, M.,  
851 Smibert, P., and Satija, R. (2019). Comprehensive Integration of Single-Cell Data. *Cell* *177*, 1888-1902 e1821.  
852 10.1016/j.cell.2019.05.031.
- 853 Sun, J., Cui, J., He, Q., Chen, Z., Arvan, P., and Liu, M. (2015). Proinsulin misfolding and endoplasmic reticulum  
854 stress during the development and progression of diabetes. *Mol Aspects Med* *42*, 105-118.  
855 10.1016/j.mam.2015.01.001.
- 856 Tabara, L.C., Morris, J.L., and Prudent, J. (2021). The Complex Dance of Organelles during Mitochondrial  
857 Division. *Trends Cell Biol* *31*, 241-253. 10.1016/j.tcb.2020.12.005.
- 858 Talchai, C., Lin, H.V., Kitamura, T., and Accili, D. (2009). Genetic and biochemical pathways of beta-cell failure  
859 in type 2 diabetes. *Diabetes Obes Metab* *11 Suppl 4*, 38-45. 10.1111/j.1463-1326.2009.01115.x.
- 860 Tanaka, S., and Hosaka, K. (1994). Cloning of a cDNA encoding a second phosphatidylinositol transfer protein of  
861 rat brain by complementation of the yeast sec14 mutation. *J Biochem* *115*, 981-984.  
862 10.1093/oxfordjournals.jbchem.a124448.
- 863 Tattikota, S.G., Rathjen, T., McAnulty, S.J., Wessels, H.H., Akerman, I., van de Bunt, M., Hausser, J., Esguerra,  
864 J.L., Musahl, A., Pandey, A.K., et al. (2014). Argonaute2 mediates compensatory expansion of the pancreatic beta  
865 cell. *Cell Metab* *19*, 122-134. 10.1016/j.cmet.2013.11.015.
- 866 Tattikota, S.G., Sury, M.D., Rathjen, T., Wessels, H.H., Pandey, A.K., You, X., Becker, C., Chen, W., Selbach, M.,  
867 and Poy, M.N. (2013). Argonaute2 regulates the pancreatic beta-cell secretome. *Mol Cell Proteomics* *12*, 1214-  
868 1225. 10.1074/mcp.M112.024786.
- 869 Thorens, B., Tarussio, D., Maestro, M.A., Rovira, M., Heikkila, E., and Ferrer, J. (2015). Ins1(Cre) knock-in mice  
870 for beta cell-specific gene recombination. *Diabetologia* *58*, 558-565. 10.1007/s00125-014-3468-5.
- 871 Traynor-Kaplan, A., Kruse, M., Dickson, E.J., Dai, G., Vivas, O., Yu, H., Whittington, D., and Hille, B. (2017).  
872 Fatty-acyl chain profiles of cellular phosphoinositides. *Biochim Biophys Acta Mol Cell Biol Lipids* *1862*, 513-522.  
873 10.1016/j.bbalip.2017.02.002.
- 874 van Raalte, D.H., and Verchere, C.B. (2017). Improving glycaemic control in type 2 diabetes: Stimulate insulin  
875 secretion or provide beta-cell rest? *Diabetes Obes Metab* *19*, 1205-1213. 10.1111/dom.12935.
- 876 Wirtz, K.W. (1991). Phospholipid transfer proteins. *Annu Rev Biochem* *60*, 73-99.  
877 10.1146/annurev.bi.60.070191.000445.
- 878 Wright, J., Birk, J., Haataja, L., Liu, M., Ramming, T., Weiss, M.A., Appenzeller-Herzog, C., and Arvan, P. (2013).  
879 Endoplasmic reticulum oxidoreductin-1alpha (Ero1alpha) improves folding and secretion of mutant proinsulin and  
880 limits mutant proinsulin-induced endoplasmic reticulum stress. *J Biol Chem* *288*, 31010-31018.  
881 10.1074/jbc.M113.510065.
- 882 Wuttke, A. (2015). Lipid signalling dynamics at the beta-cell plasma membrane. *Basic Clin Pharmacol Toxicol*  
883 *116*, 281-290. 10.1111/bcpt.12369.
- 884 Xie, Z., and Bankaitis, V.A. (2022). Phosphatidylinositol transfer protein/planar cell polarity axis regulates  
885 neocortical morphogenesis by supporting interkinetic nuclear migration. *Cell Rep* *39*, 110869.  
886 10.1016/j.celrep.2022.110869.
- 887 Xie, Z., Hur, S.K., Zhao, L., Abrams, C.S., and Bankaitis, V.A. (2018). A Golgi Lipid Signaling Pathway Controls  
888 Apical Golgi Distribution and Cell Polarity during Neurogenesis. *Dev Cell* *44*, 725-740 e724.  
889 10.1016/j.devcel.2018.02.025.



890 Xin, Y., Kim, J., Okamoto, H., Ni, M., Wei, Y., Adler, C., Murphy, A.J., Yancopoulos, G.D., Lin, C., and  
891 Gromada, J. (2016). RNA Sequencing of Single Human Islet Cells Reveals Type 2 Diabetes Genes. *Cell Metab* 24,  
892 608-615. 10.1016/j.cmet.2016.08.018.

893 Yong, J., Johnson, J.D., Arvan, P., Han, J., and Kaufman, R.J. (2021). Therapeutic opportunities for pancreatic  
894 beta-cell ER stress in diabetes mellitus. *Nat Rev Endocrinol* 17, 455-467. 10.1038/s41574-021-00510-4.

895 Youle, R.J., and van der Bliek, A.M. (2012). Mitochondrial fission, fusion, and stress. *Science* 337, 1062-1065.  
896 10.1126/science.1219855.

897 Zinszner, H., Kuroda, M., Wang, X., Batchvarova, N., Lightfoot, R.T., Remotti, H., Stevens, J.L., and Ron, D.  
898 (1998). CHOP is implicated in programmed cell death in response to impaired function of the endoplasmic  
899 reticulum. *Genes Dev* 12, 982-995. 10.1101/gad.12.7.982.

900  
901 **FIGURE LEGENDS**

902  
903 **Figure 1. *PITPNA* expression is decreased in isolated islets of T2D human subjects.** **A**, Immunostaining of  
904 endogenous INSULIN (cyan), and *PITPNA* (red) expression within pancreatic islets isolated from a non-diabetic  
905 human subject. Scale bar = 20 $\mu$ m. **B**, UMAP projection and graph-based clustering of scRNA-Seq analysis performed  
906 on isolated human pancreatic islet cell types. **C**, Relative abundance of *PITPNA* in islet cell clusters from human  
907 donors. **D**, Comparison of *PITPNA* expression in islet endocrine cell types from T2D (green) and non-diabetic donors  
908 (red). **E**, Normalized *PITPNA* expression from bulk RNA sequencing of isolated human islets across non-diabetic  
909 (HbA1c levels <5.7, n=51), pre-diabetic (HbA1c between 5.7 and 6.4, n=27), and T2D (HbA1c >6.5, n=11) human  
910 subjects. Normalized expression values are shown in reads per million (RPM). **F**, Correlation analysis between  
911 normalized islet *PITPNA* expression and HbA1c of human subjects (n=77). The  $R^2$  value indicates the correlation  
912 coefficient. **G**, Correlation analysis between normalized islet *PITPNA* expression and body mass index (BMI) of  
913 human subjects (n=89). The  $R^2$  value indicates correlation coefficient. **H**, qRT-PCR analysis of *PITPNA* mRNA  
914 expression in pancreatic islets isolated from non-diabetic (n=15) and T2D (n=5) human donors. **I**, Western blot  
915 analysis of *PITPNA* expression in isolated islets of non-diabetic human donors (Non) and T2D donors (T2D). Results  
916 presented as mean  $\pm$  SEM. \* $P$  < 0.05.

917  
918 **Figure 2. Conditional deletion of *Pitpna* in the pancreatic beta-cell impairs glucose-stimulated insulin**  
919 **secretion.** **A**, Western blot analysis of *Pitpna* in isolated islets from *Ins-Cre*, *Pitpna*<sup>flox/flox</sup> and littermate control wild-  
920 type (WT) mice at age 8 weeks (n=3). Metabolic parameters were assessed in *Ins-Cre*, *Pitpna*<sup>flox/flox</sup> and WT mice at  
921 age 8 weeks including: **B**, random-fed and overnight 16-hour fasted blood glucose and plasma insulin (n=6), **C**,  
922 plasma insulin after glucose bolus (n=6), and **D**, blood glucose measurements after glucose bolus (n=6). **E**,  
923 Quantification of insulin release in response to 2.8mM and 16.7mM glucose concentrations and KCl (40mM) from  
924 isolated islets of 10-week-old *Ins-Cre*, *Pitpna*<sup>flox/flox</sup> and WT mice (n=5). **F**, Representative transmission electron  
925 micrographs of pancreatic beta-cells from 10-week-old *Ins-Cre*, *Pitpna*<sup>flox/flox</sup> and WT mice. Quantification of **G**,  
926 docked vesicles, and **H**, granule morphology (immature secretory granule (ISG, blue box), mature secretory granules  
927 (MSG, red box), crystal-containing granules (CCG, yellow box), and empty secretory granules (ESG, orange box))

928 in beta-cells of 10-week-old *Ins-Cre*, *Pitpna*<sup>lox/lox</sup> and WT mice (n=8). **I**, Immunostaining of insulin and glucagon  
929 (Gcg) in paraffin-embedded pancreata from 10-week-old *Ins-Cre*, *Pitpna*<sup>lox/lox</sup> and WT mice. Scale bar= 100µm. In  
930 far-right panel, scale bar= 50µm. **J**, Islet morphometric analysis including islet number per area pancreas (mm<sup>2</sup>),  
931 insulin<sup>+</sup> cells per area pancreas and pancreatic beta-cell mass in 10-week old *Ins-Cre*, *Pitpna*<sup>lox/lox</sup> and WT mice  
932 (n=5). Results presented as mean ± SEM. \**P*< 0.05, \*\**P*< 0.01, \*\*\**P*<0.001, and n.s. denotes not significant. See  
933 also Figure S3.

934

935 **Figure 3. Loss of *Pitpna* increases beta-cell apoptosis and expression of endoplasmic reticulum (ER) stress**  
936 **markers.** Immunostaining in paraffin-embedded pancreata from 10-week-old *Ins-Cre*, *Pitpna*<sup>lox/lox</sup> and littermate  
937 control wild-type (WT) mice was performed to assess: **A**, insulin (red), glucagon (Gcg, magenta) and apoptotic  
938 marker (TUNEL, green) Scale bar= 50µm. In far-right panel, scale bar= 20µm, **B**, TUNEL-positive beta cell number  
939 (n=6), and **C**, TUNEL-positive alpha cell number (n=6). **D**, Western blot analysis of *Pitpna*, BiP/GRP78, and CHOP  
940 after treatment of hydrogen peroxide (H<sub>2</sub>O<sub>2</sub>) in isolated islets of 10-week-old *Ins-Cre*, *Pitpna*<sup>lox/lox</sup> and WT mice. **E**,  
941 qRT-PCR analysis of *Pitpna*, *PC1/3*, *PC2*, *CPE*, *CGA* and *CGB* mRNA expression in islets of WT and *Ins-Cre*,  
942 *Pitpna*<sup>lox/lox</sup> mice at age 10 weeks (n=5). Results presented as mean ± SEM. \**P*< 0.05, \*\*\**P*<0.001, and n.s. denotes  
943 not significant.

944

945 **Figure 4. *PITPNA* regulates insulin secretion in human pancreatic beta-cells.** **A**, Western blot analysis of  
946 *PITPNA* in isolated islets from non-diabetic human donors after treatment with lentiviruses encoding either an  
947 shRNA targeting *PITPNA* (sh-*PITPNA*), cDNA of human *PITPNA* (OE-*PITPNA*), or empty control vector (sh-*Ctrl*).  
948 **B**. Quantification of insulin release in response to 2.8mM and 25mM glucose concentrations from isolated islets from  
949 non-diabetic human subjects after lentiviral-mediated over-expression of *PITPNA* (OE-*PITPNA*) or inhibition of  
950 *PITPNA* (sh-*PITPNA*) in comparison to treatment with control lentivirus (sh-*Ctrl*) (n=4). **C**, Quantification of  
951 intracellular Ca<sup>2+</sup> concentration in isolated human islets after lentiviral-mediated inhibition of *PITPNA* (sh-*PITPNA*)  
952 in comparison to control lentivirus (sh-*Ctrl*) (n=5). **D**, **E**, Representative TIRF images of human beta-cells expressing  
953 the granule marker NPY-tdmOrange2 after treatment with lentiviruses encoding GFP control (*Ctrl*), cDNA of human  
954 *PITPNA* (OE-*PITPNA*) in panel (**D**), as well as an shRNA pool targeting *PITPNA* (sh-*PITPNA*) or shRNA control  
955 (sh-*Ctrl*) in panel (**E**); Scale bar, 4 µm. **F**, **G**, Cumulative time course of high K<sup>+</sup>-evoked exocytosis events normalized  
956 to cell area, for conditions as in **D**, **E**. Bars at individual time points indicate SEM., K<sup>+</sup> was elevated to 75mM during  
957 t=10-50 seconds. **H**, Total exocytosis measured during TIRF analysis of human beta-cells expressing the granule  
958 marker NPY-tdmOrange2 after lentivirus treatments represented in panels (**D**) and (**E**). Data set was generated from  
959 3 unique human donors; dots and their color/symbol indicate individual cells and donor, respectively. Data presented  
960 as mean ± SEM, unless otherwise indicated. \*\*\**P*<0.001, and n.s. denotes not significant. See also Figure S4.

961

962 **Figure 5. *PITPNA* regulates insulin granule maturation and proinsulin processing in human pancreatic beta-**  
963 **cells. A,** Representative transmission electron micrographs of pancreatic beta-cells from non-diabetic human donors  
964 after lentiviral-mediated over-expression of *PITPNA* (OE-*PITPNA*) or inhibition of *PITPNA* (sh-*PITPNA*) in  
965 comparison to control lentivirus (sh-*Ctrl*); granule profile: immature secretory granule (blue box), mature secretory  
966 granules (red box), crystal-containing granules (yellow box), and empty secretory granules (orange box). **B, C,**  
967 Quantification of granule density and docked vesicles in beta-cells of lentiviral-treated human islets shown in panel  
968 (A) (n=4). **D,** Quantification of immature secretory granule (ISG), mature secretory granules (MSG), crystal-  
969 containing granules (CCG), and empty secretory granules (ESG) in beta-cells of isolated human islets after lentiviral  
970 treatments shown in panel (A) (n=8-9). **E, F,** Quantification of proinsulin in isolated human islets after densitometric  
971 analysis of western blots shown in panel (F). **G,** Western blot analysis of *PITPNA*, and ER stress/unfolded protein  
972 response (UPR) proteins IRE1 $\alpha$ , ERO1, PDI, and CHOP in human islets after lentiviral-mediated over-expression of  
973 *PITPNA* (OE-*PITPNA*), knockdown of *PITPNA* (sh-*PITPNA*) or control lentivirus (sh-*Ctrl*). Results presented as  
974 mean  $\pm$  SEM. \* $P$  < 0.05; \*\* $P$  < 0.01; \*\*\* $P$  < 0.001, and n.s. denotes not significant. See also Figure S4.

975  
976 **Figure 6. Inhibition of *PITPNA* in isolated human islets disrupts subcellular localization of PtdIns-4-P to the**  
977 **TGN. A, B** Immunostaining for INSULIN and PtdIns-4-P, and quantification of the intensity of PtdIns-4-P in isolated  
978 human islets after lentiviral-mediated inhibition of *PITPNA* (sh-*PITPNA*) or treatment with control lentivirus (sh-  
979 *Ctrl*) (n=5-7). Scale bar = 20 $\mu$ m. **C, D** Quantification of GOLGIN97 and GOLPH3 colocalization after  
980 immunostaining of isolated human islets after lentiviral-mediated inhibition of *PITPNA* (sh-*PITPNA*) (n=10) or  
981 treatment with control lentivirus (sh-*Ctrl*) (n=23). **E,** Quantification of phosphatidylinositol-phosphate (PtdIns or  
982 PIP) species in isolated human islets after lentiviral-mediated over-expression of *PITPNA* (OE-*PITPNA*) or treatment  
983 with a control lentivirus (*Ctrl*) (n=3). Results normalized to total cellular PtdIns (PI). **F,** Quantification of  
984 phosphatidylinositol-phosphate (PtdIns or PIP) species in isolated human islets after lentiviral-mediated inhibition of  
985 *PITPNA* (sh-*PITPNA*) or treatment with a lentivirus expressing an shRNA control (sh-*Ctrl*) (n=4) and normalized to  
986 total cellular PtdIns (PI). Results presented as mean  $\pm$  SEM. \* $P$  < 0.05, \*\* $P$  < 0.01, \*\*\* $P$  < 0.001. See also Figure S5.

987  
988 **Figure 7. Restoration of *PITPNA* in isolated islets of T2D human subjects rescues pancreatic beta-cell function.**  
989 **A,** Western blot analysis of *PITPNA* in human non-diabetic (Non), and T2D islets after either lentiviral-mediated  
990 over-expression of *PITPNA* (T2D-*PITPNA* OE) or treatment with a control lentivirus (T2D) (n=2). **B,** Quantification  
991 of insulin release from isolated islets from T2D donors after either lentiviral-mediated over-expression of *PITPNA*  
992 (T2D-*PITPNA* OE) or treatment with a control lentivirus (T2D) (n=4). **C, D** Quantification of GOLGIN97 and  
993 GOLPH3 colocalization after immunostaining of isolated human islets from T2D donors after either lentiviral-  
994 mediated over-expression of *PITPNA* (T2D-*PITPNA* OE) or treatment with a control lentivirus (T2D) (n=15). Scale  
995 bar = 10 $\mu$ m. **E,** Representative transmission electron micrographs of pancreatic beta-cells of non-diabetic (ND) or  
996 T2D human donors after treatment with a control lentivirus (T2D) or lentiviral-mediated over-expression of *PITPNA*

997 (T2D-*PITPNA* OE); immature secretory granule (blue box), mature secretory granules (red box), crystal-containing  
998 granules (yellow box), and empty secretory granules (orange box). Quantification of **F**, granule density, **G**, docked  
999 vesicles, and **H**, granule profile: immature secretory granule (ISG), mature secretory granules (MSG), crystal-  
1000 containing granules (CCG), and empty secretory granules (ESG) in beta-cells of non-diabetic (ND) or T2D human  
1001 donors after treatment with a control lentivirus (T2D) or lentiviral-mediated over-expression of *PITPNA* (T2D-  
1002 *PITPNA* OE) (n=4). Results presented as mean  $\pm$  SEM. \* $P$ < 0.05; \*\* $P$ < 0.01; \*\*\* $P$ < 0.001, and n.s. denotes not  
1003 significant. See also Figure S6.

1004

1005 **Figure S1. *Pitpna* is a direct target of miR-375 in the pancreatic beta-cell.** **A**, Reporter activity in MIN6 cells  
1006 transfected with a Renilla luciferase reporter construct containing the 3'UTR of the *Pitpna* gene in addition to either  
1007 a miR-375-mimic or scrambled control mimic pool. *Pitpna* WT, construct contains the wild-type sequence of *Pitpna*  
1008 3'UTR; *Pitpna* MUT, construct contains a 3'UTR sequence where 4 nucleotides of the putative sequence  
1009 complementary to the miR-375 seed sequence of *Pitpna* 3'UTR were mutated (n=4). **B**, qRT-PCR analysis for miR-  
1010 375 and *Pitpna* expression (n=4) in MIN6 cells after transfection of either an inhibitory antisense RNA  
1011 oligonucleotide complimentary to miR-375 (Antg-375) or scrambled RNA oligonucleotide control pool (Antg-ctrl).  
1012 **C**, Western blot analysis of *Pitpna*, *Cadm1* and *Gphn* in MIN6 cells, transfected with the Antg-375 or Antg-ctrl. **D**,  
1013 Western blot analysis of *Pitpna*, *Cadm1*, and *Gphn* in MIN6 cells transfected with the miR-375-mimic or scrambled  
1014 mimic control pool. **E**, qRT-PCR analysis of *Pitpna*, *Cadm1*, *Gephyrin*, and *Ago2* mRNA expression in islets of WT  
1015 and *Ins-Cre*, *Ago2<sup>lox/lox</sup>* mice at 10 weeks of age (n=4). **F**, Targeted analysis of PtdIns (PI) species in MIN6 cells after  
1016 transfection of either an inhibitory antisense RNA oligonucleotide complementary to miR-375 (antg-375) or  
1017 scrambled RNA oligonucleotide control pool (antg-ctrl); Lipid species were expressed as mean molar fractions (n=6).  
1018 Results are presented as mean  $\pm$  SEM. \* $P$ < 0.05, \*\* $P$ < 0.01, \*\*\* $P$ <0.001, and n.s. denotes not significant.

1019

1020 **Figure S2. Whole-body *Pitpna* knockout mice exhibit decreased pancreatic beta-cell mass.** **A**, Immunostaining  
1021 of insulin and glucagon (Gcg) in paraffin-embedded pancreata from whole-body *Pitpna* knockout (*Pitpna* KO) and  
1022 littermate wild-type (WT) control mice at age P0. Scale bar = 50 $\mu$ m. In far-right panel, scale bar = 20 $\mu$ m. **B**,  
1023 Quantification of insulin<sup>+</sup> cells and islet number per area pancreas (mm<sup>2</sup>) in *Pitpna* KO and littermate control mice  
1024 at age P0 (n=5). **C**, Quantification of total pancreatic insulin and proinsulin content per pancreatic weight (mg) in  
1025 *Pitpna* KO and littermate control mice at age P0 (n=7-13). **D**, Transmission electron micrographs of pancreas from  
1026 WT and total *Pitpna* knockout mice (*Pitpna* KO) at age P0. Scale bar= 2 $\mu$ m (left and center panel) and 500 nm (right  
1027 panel). Dashed black box identifies image in center panel. Yellow arrows identify immature insulin granules (center  
1028 panel). Solid red and blue lines in center panel identifies plasma membrane. Blue arrows in right panel identify docked  
1029 vesicles. **E**, Quantification of docked vesicles, and immature secretory granule (ISG), mature secretory granules  
1030 (MSG), and empty secretory granules (ESG) in beta-cells of WT and *Pitpna* KO mice (n=5-15). **F**, Quantification of  
1031 granule size in WT and *Pitpna* KO mice (n=4). **G**, Immunostaining of insulin, glucagon (Gcg) in addition to apoptotic

1032 marker TUNEL in paraffin-embedded pancreata from total *Pitpna* knockout (*Pitpna* KO) and littermate control (WT)  
1033 mice at age P0. Scale bar= 30 $\mu$ m. **H**, Quantification of TUNEL-positive beta cells in pancreata from total *Pitpna*  
1034 knockout (*Pitpna* KO) and littermate control (WT) mice at age P0 (n=5). **I**, Quantification of TUNEL-positive alpha  
1035 cells in pancreata from total *Pitpna* knockout (*Pitpna* KO) and littermate control (WT) mice at age P0 (n=5). **J**,  
1036 Immunostaining of insulin and Ki67 in paraffin-embedded pancreata from total *Pitpna* knockout (*Pitpna* KO) and  
1037 littermate control (WT) mice at age P0. Scale bar = 50  $\mu$ m. In far-right panel, scale bar = 10  $\mu$ m. **K**, Quantification of  
1038 Ki67-positive beta cells in pancreata from total *Pitpna* knockout (*Pitpna* KO) and littermate control (WT) mice at  
1039 age P0 (n=5). Results presented as mean  $\pm$  SEM. \* $P$ <0.05, \*\* $P$ <0.01 and \*\*\* $P$ <0.001, and n.s. denotes not  
1040 significant.

1041

1042 **Figure S3. *Pitpna* regulates pancreatic beta-cell function.** **A**, Quantification of glucose-stimulated insulin  
1043 secretion from MIN6 cells after siRNA-mediated knockdown of *Pitpna* or control transfected cells (n=4). **B**, **C**,  
1044 quantitative RT-PCR (n=4) and western blot analysis after siRNA-mediated knockdown of *Pitpna* and scrambled  
1045 control in MIN6 cells. **D**, Quantification of cellular insulin content after siRNA-mediated knockdown of *Pitpna* and  
1046 scrambled control in MIN6 cells (n=4). **E**, Measurement of glucose-stimulated insulin release from isolated mouse  
1047 islets after overexpression of *Pitpna* (n=3). **F**, **G**, quantitative RT-PCR (n=4) and western blot analysis after  
1048 overexpression of *Pitpna* or scrambled control transfection in MIN6 cells (n=3). **H**, Measurement of cellular insulin  
1049 content after overexpression of *Pitpna* or scrambled control transfection in MIN6 cells (n=3). Results presented as  
1050 mean  $\pm$  S.E.M. \* $P$ < 0.05; \*\* $P$ < 0.01; \*\*\* $P$ < 0.001, and n.s. denotes not significant. AU is arbitrary units.

1051

1052 **Figure S4. Conditional deletion of *Pitpna* in the beta-cell induces alterations in mitochondrial configuration**  
1053 **and morphology.** **A**, Representative Seahorse flux analysis of oxygen consumption rate (OCR) in MIN6 cells after  
1054 siRNA-mediated knockdown of *Pitpna* (n=7). During experiment, cells were exposed to oligomycin (O), FCCP (F),  
1055 and the combination of rotenone and antimycin A (R/A) at the time points indicated. **B**, Basal and maximal respiration  
1056 were measured after either siRNA-mediated knockdown of *Pitpna* or scrambled control transfection in MIN6 cells.  
1057 **C**, Representative Seahorse flux analysis of extracellular acidification rate (ECAR) in MIN6 cells after siRNA-  
1058 mediated knockdown of *Pitpna* (n=7). and **D**, Glycolysis and glycolytic capacity were measured after either siRNA-  
1059 mediated knockdown of *Pitpna* or scrambled control transfection in MIN6 cells. **E**, Representative transmission  
1060 electron micrographs of mitochondria within pancreatic beta-cells of *Ins*-Cre, *Pitpna*<sup>fllox/fllox</sup> and littermate control  
1061 (WT) mice at age 8 weeks (n=4-5). Scale bar = 1 $\mu$ m. **F**, Quantification of mitochondrial length distribution in *Ins*-  
1062 Cre, *Pitpna*<sup>fllox/fllox</sup> and littermate control (WT) mice at age 8 weeks (n=4-5). **G**, Representative transmission electron  
1063 micrographs identify unique mitochondrial configurations. Scale bar = 1 $\mu$ m. **H**, Quantification of distribution of  
1064 mitochondrial configurations in pancreatic beta-cells of *Ins*-Cre, *Pitpna*<sup>fllox/fllox</sup> and littermate control (WT) mice at age  
1065 8 weeks (n=7). **I**, Western blot analysis of *Pitpna*, and Dynamin related protein 1 (Drp1) in isolated islets of 10-week-

1066 old *Ins-Cre, Pitpna<sup>fllox/fllox</sup>* and littermate control (WT) mice. Results presented as mean  $\pm$  SEM. \* $P < 0.05$ , \*\*\* $P < 0.001$ ,  
1067 and n.s. denotes not significant.

1068

1069 **Figure S5. *PITPNA* regulates mitochondrial morphology in human pancreatic beta-cells.** **A**, Quantification of  
1070 knockdown of *PITPNA* in human pancreatic 1.1B4 cells by individual shRNA clones by qRT-PCR. **B**, Representative  
1071 transmission electron micrographs reveal mitochondrial morphology in pancreatic beta-cells from isolated human  
1072 islets after lentiviral-mediated over-expression of *PITPNA* (OE-*PITPNA*) or inhibition of *PITPNA* (sh-*PITPNA*) or  
1073 treatment with control lentivirus (sh-*Ctrl*). **C**, Quantification of mitochondrial length distribution in pancreatic beta-  
1074 cells from isolated human islets after lentiviral-mediated over-expression of *PITPNA* (OE-*PITPNA*) or inhibition of  
1075 *PITPNA* (sh-*PITPNA*) or treatment with control lentivirus (sh-*Ctrl*). **D**, Mitochondrial morphology in beta-cells of  
1076 isolated human islets after lentiviral-mediated over-expression of *PITPNA* (OE-*PITPNA*), inhibition of *PITPNA* (sh-  
1077 *PITPNA*), or treatment with control lentivirus (sh-*Ctrl*) (n=7). **E**, Quantification of phosphatidylinositol (PI) after  
1078 lentiviral-mediated over-expression of *PITPNA* (OE-*PITPNA*) or treatment with control lentivirus (*Ctrl*) (n=3). **F**,  
1079 Quantification of phosphatidylinositol (PI) in isolated human islets after lentiviral-mediated inhibition of *PITPNA*  
1080 (sh-*PITPNA*) or treatment with a lentivirus expressing an shRNA control (sh-*Ctrl*) (n=4). Results are presented as  
1081 mean  $\pm$  SEM. \* $P < 0.05$ ; \*\* $P < 0.01$ ; \*\*\* $P < 0.001$ , and n.s. denotes not significant.

1082

1083 **Figure S6. Restoration of *PITPNA* in isolated islets of T2D human subjects improves insulin secretion and**  
1084 **reverses expression of ER stress proteins.** **A**, Quantification of insulin release from isolated human islets from  
1085 individual T2D donors after lentiviral-mediated over-expression of *PITPNA* (T2D-*PITPNA* OE) or treatment with a  
1086 control lentivirus (T2D-*Ctrl*) (n=4). **B**, Western blot analysis of *PITPNA* and ER stress/unfolded protein response  
1087 (UPR) proteins IRE1 $\alpha$ , CHOP, ERO1, PDI, and BiP/Grp78 in T2D human islets after lentiviral-mediated over-  
1088 expression of *PITPNA* (T2D-OE), or treatment with a control lentivirus (T2D-*Ctrl*) (n=4). Summary of mean fold  
1089 change values displayed at right. **C**, Western blot analysis of proinsulin in T2D human islets after lentiviral-mediated  
1090 over-expression of *PITPNA* (T2D-OE), or treatment with a control lentivirus (T2D-*Ctrl*) (n=4). Summary of mean  
1091 fold change values displayed at right. Results presented as mean  $\pm$  SEM. \* $P < 0.05$ ; \*\* $P < 0.01$ , and n.s. denotes not  
1092 significant.

1093

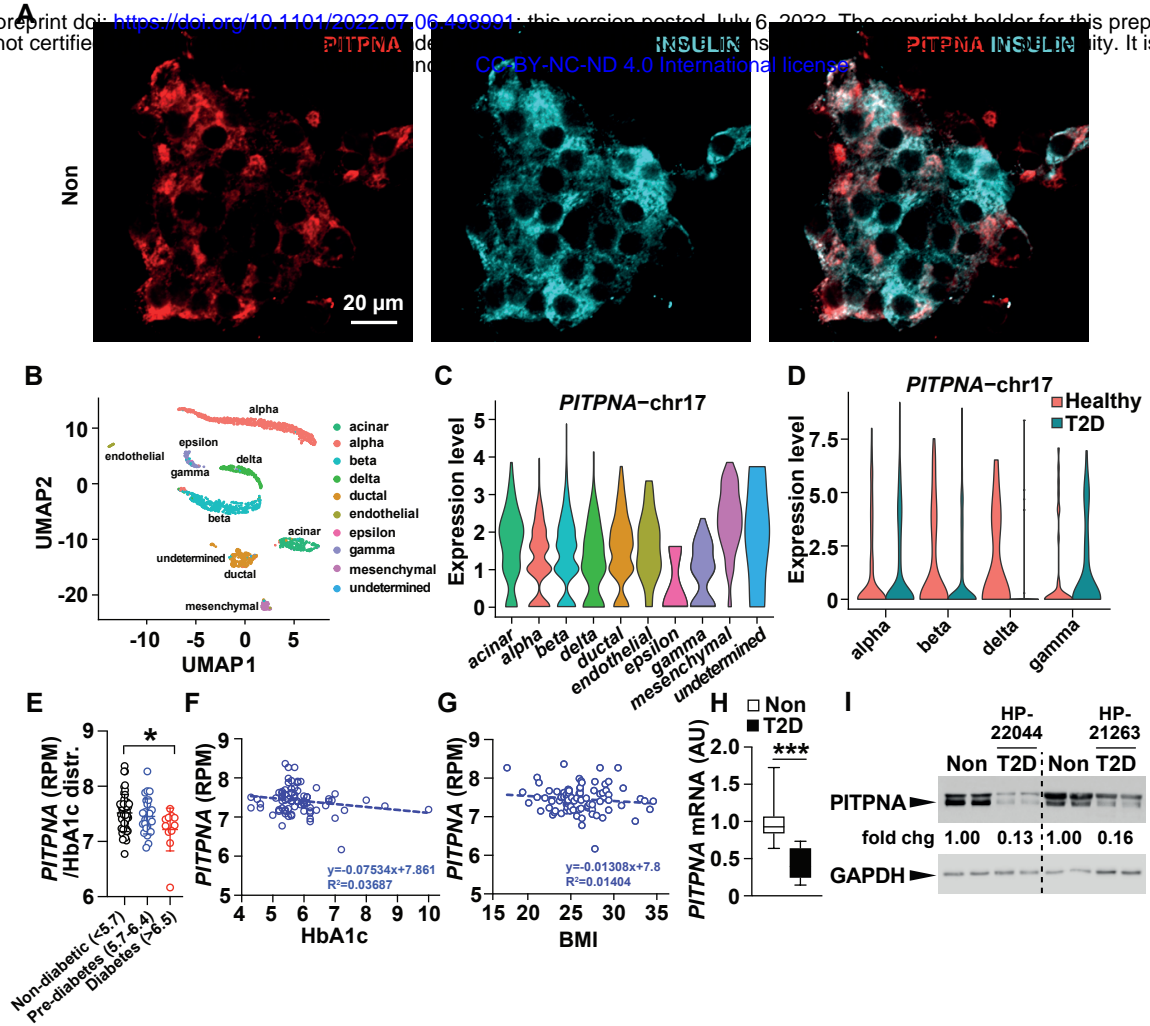

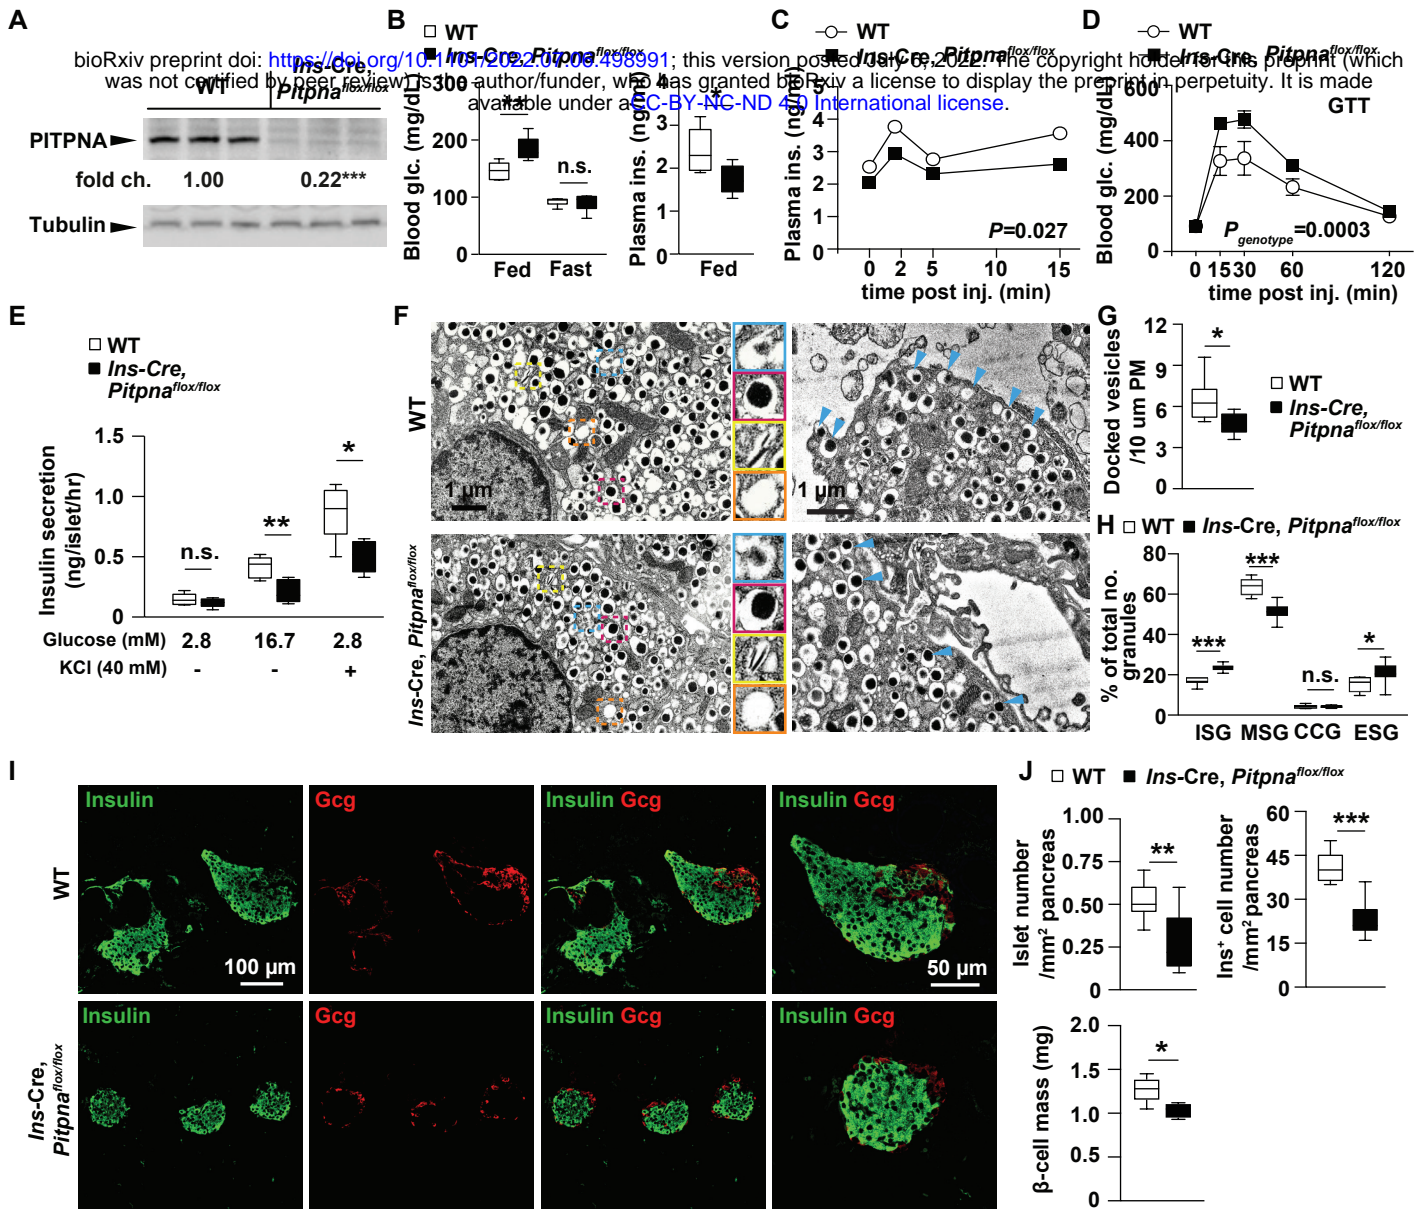



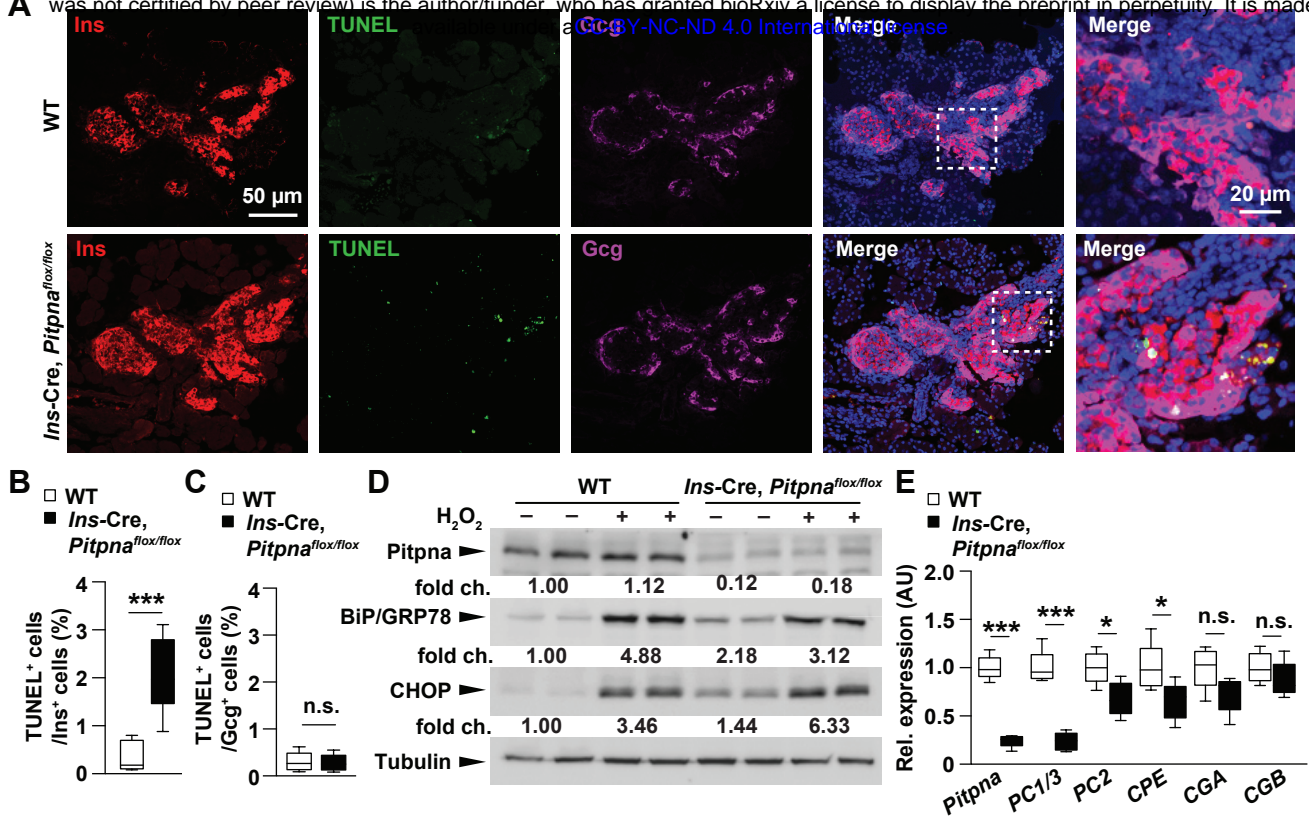

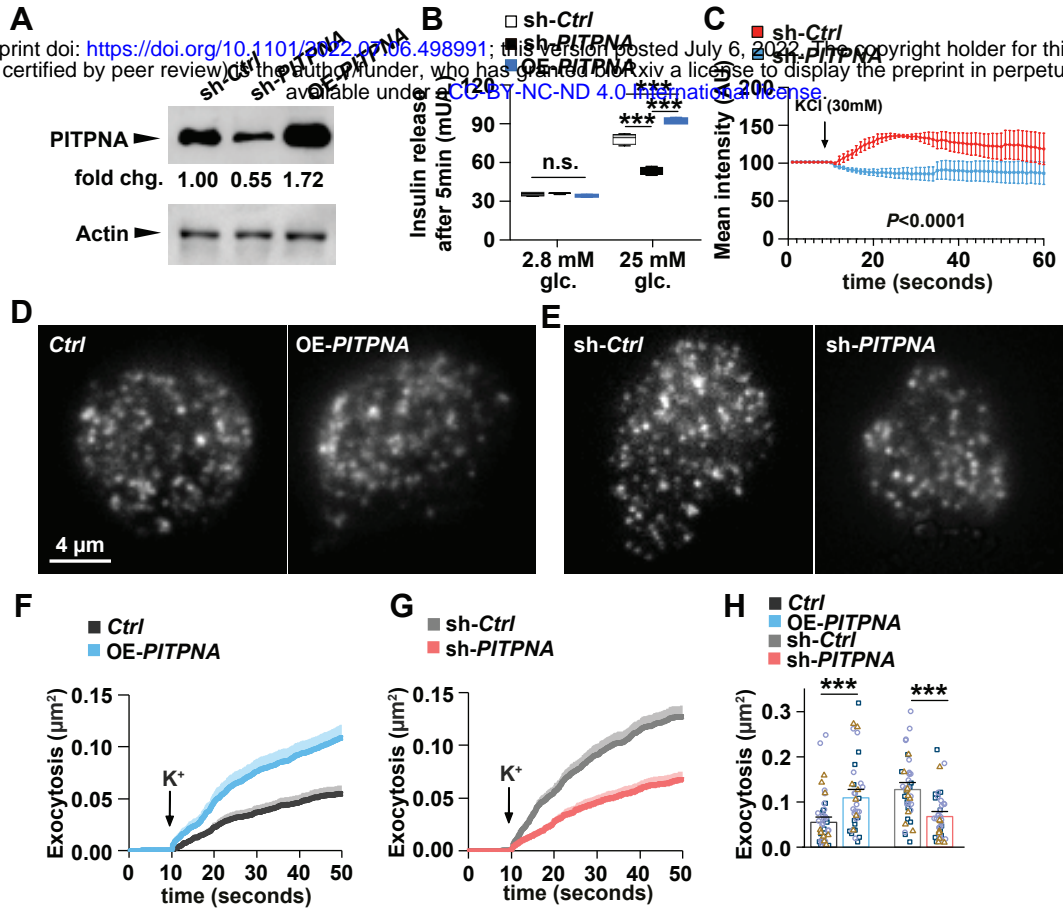

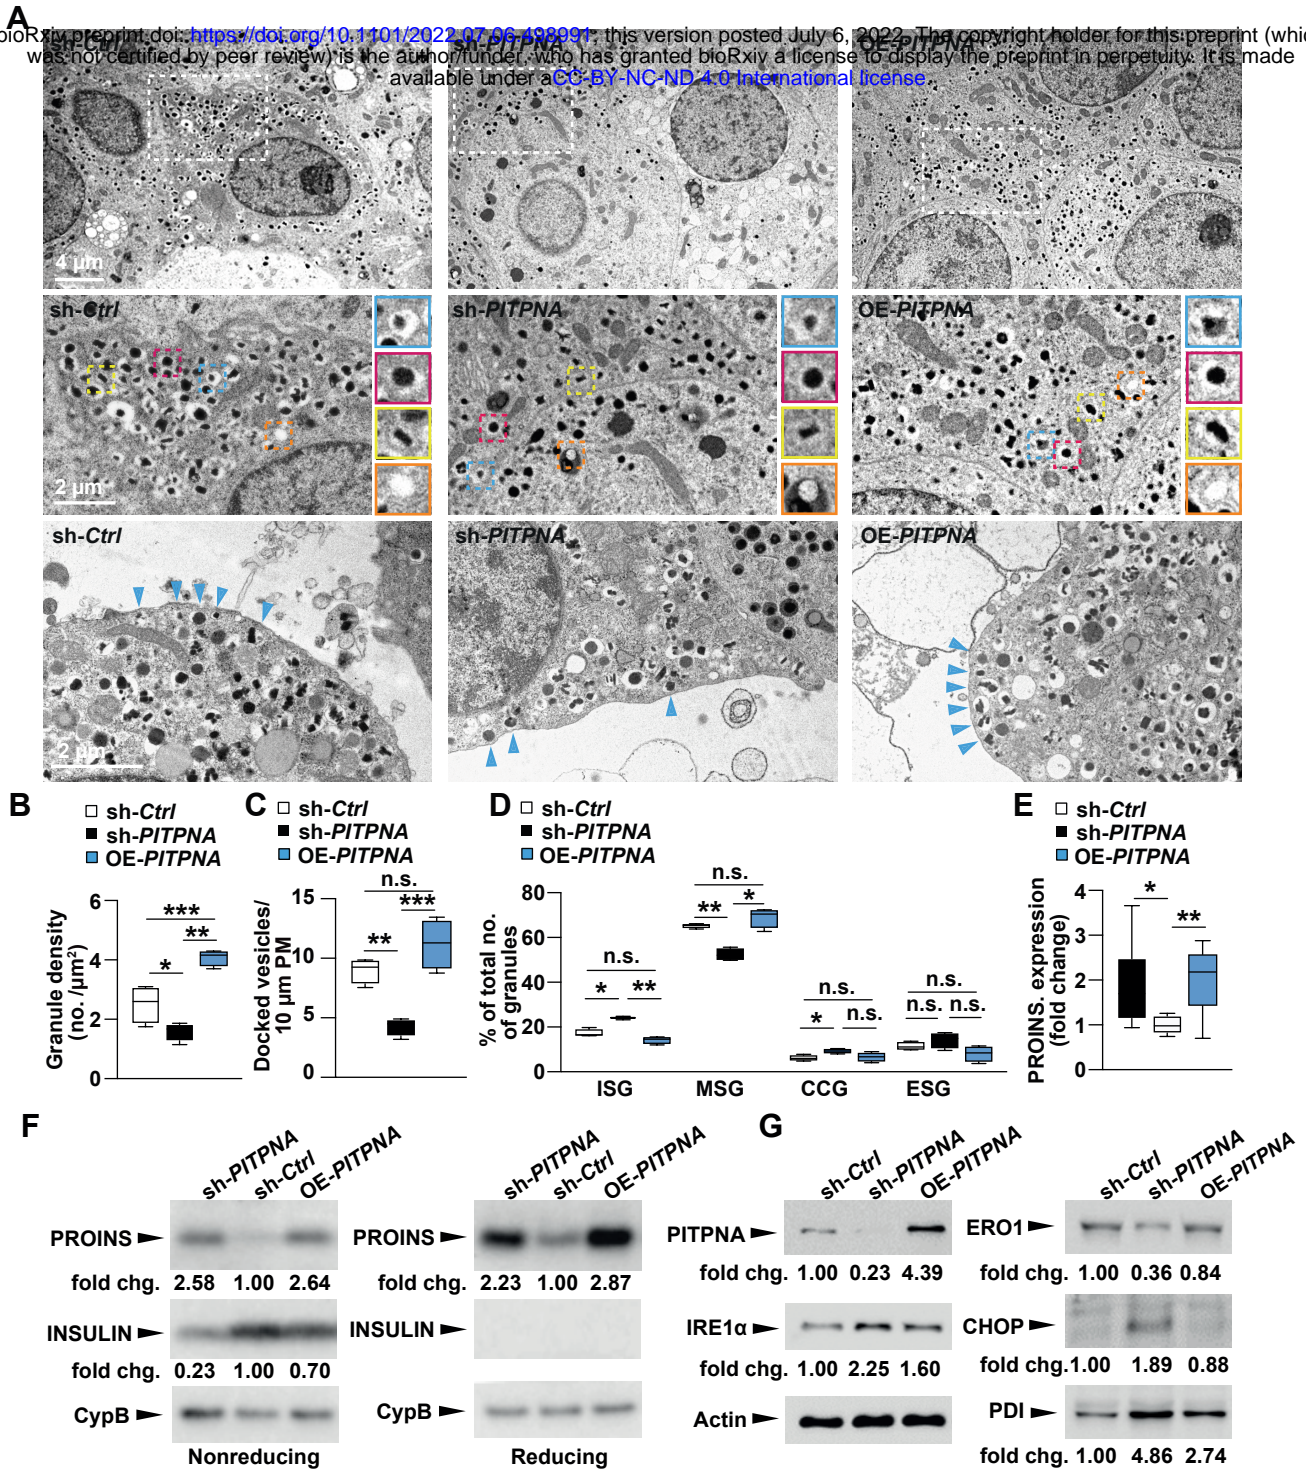

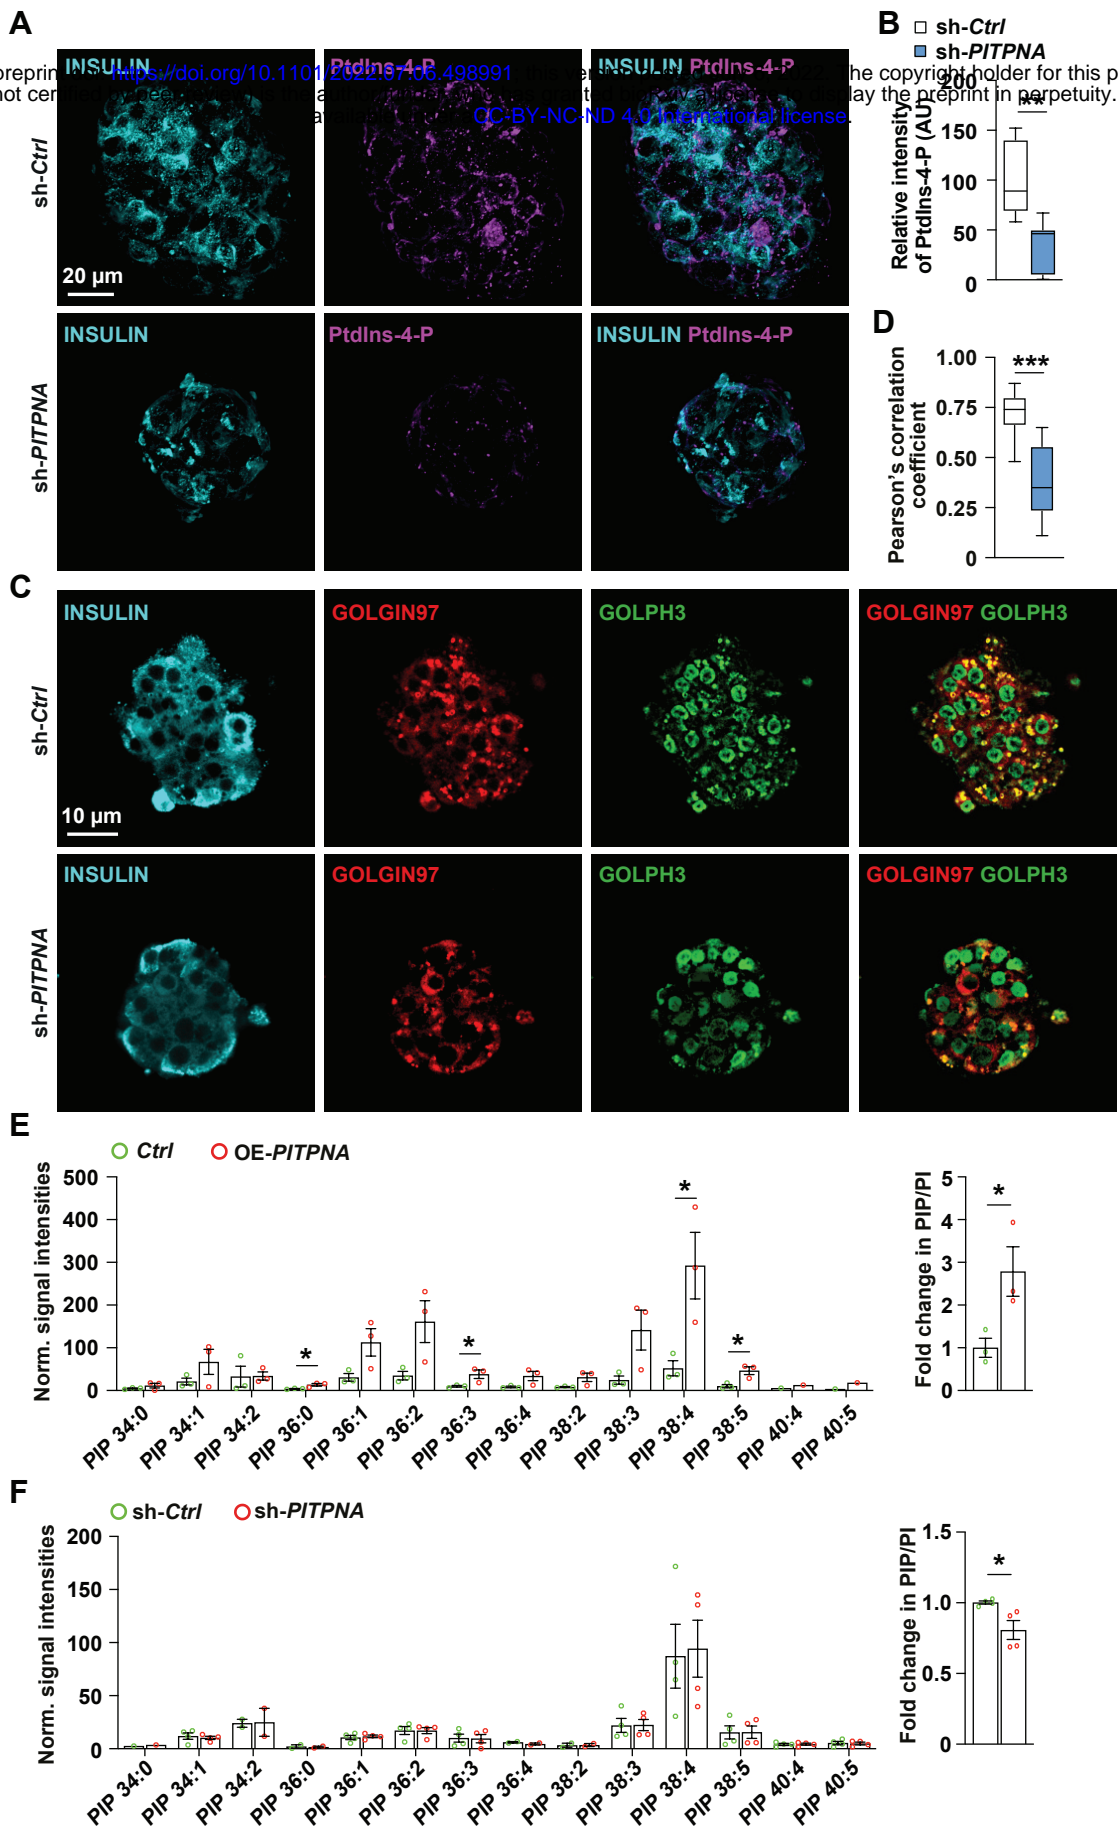

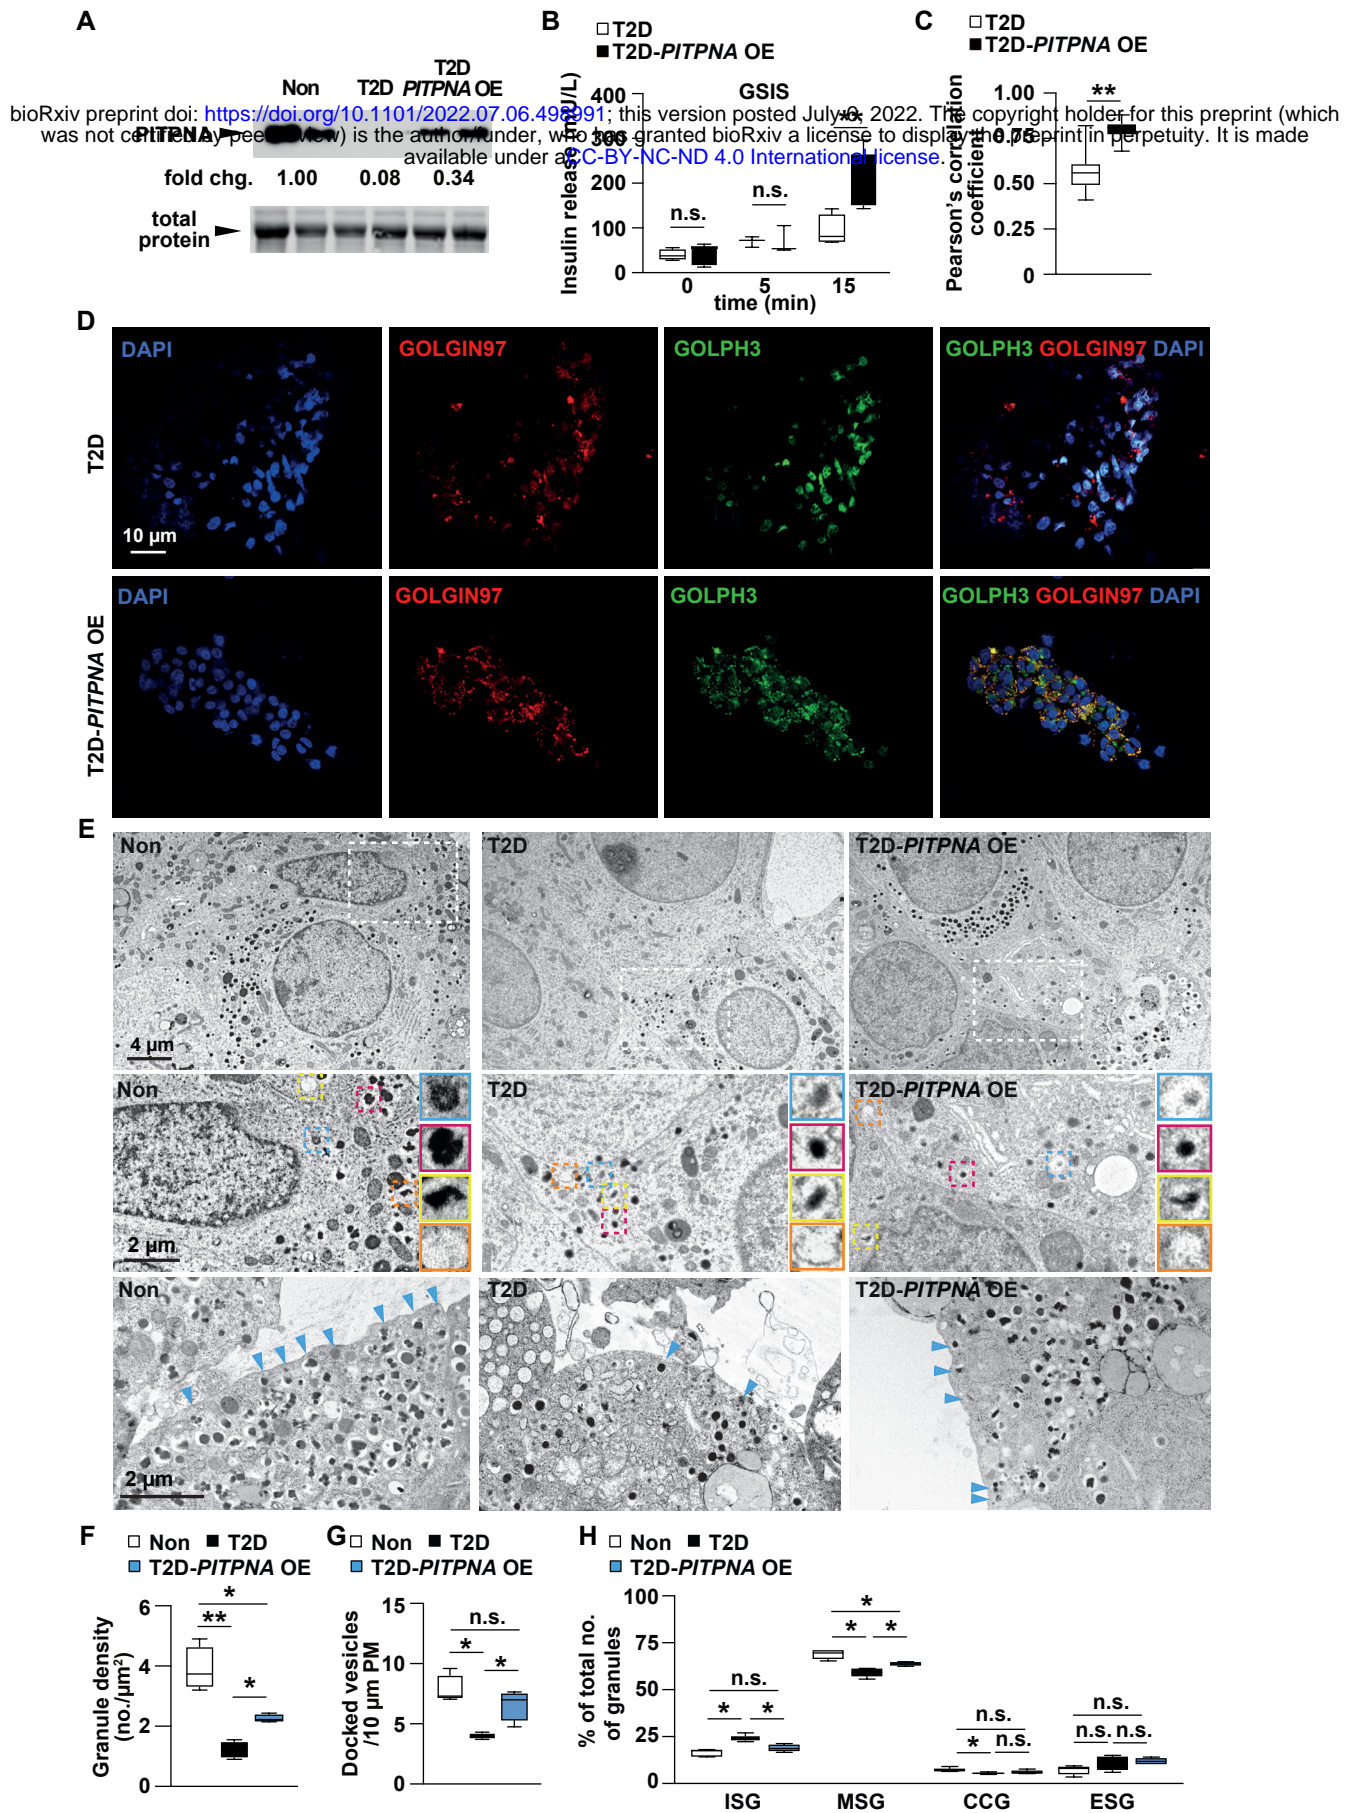

Source: https://www.biorxiv.org/content/10.1101/2022.07.06.498991v1.full.pdf
